# Supplementary material
Source: PubMed Central journal article supplement (PMC5839297)
Supplement: jama-319-452-s002.pdf [file jama-319-452-s002.pdf]

## Supplementary Online Content

1  
2  
3  
4  
5  
6  
7  
8  
9  
10  
11  
12  
13  
14  
15  
16  
17  
18  
19  
20  
21  
22  
23

Ng PY, Ng AK, Subramaniam B, et al. Association of preoperatively-diagnosed patent foramen ovale with perioperative ischemic stroke. *JAMA*. doi:10.1001/jama.2017.21899

eFigure 1a. Receiver operating characteristic (ROC) curve of the primary regression model

eFigure 1b. Calibration plot of the primary regression model

eFigure 2. Power analysis for falsification tests

eFigure 3. Histogram of variables with missing data and the pattern of missingness

eTable 1. International classification of diseases, ninth and tenth edition (ICD-9/10) diagnostic codes used to define exposure, outcome, and confounder variables

eTable 2. Characterization of major cardiovascular and thromboembolic conditions at the time of PFO diagnosis

eTable 3. Type of surgery

eTable 4. Sample size and power calculation

eTable 5. Baseline and intraoperative characteristics of subgroups stratified by baseline PFO-independent risk of stroke

eTable 6. Baseline and intraoperative characteristics of subgroups stratified by history of echocardiography prior to surgery

This supplementary material has been provided by the authors to give readers additional information about their work.

24 **Association of preoperatively-diagnosed patent foramen ovale with perioperative ischemic**  
25 **stroke**

26 **Supplementary appendix**

27

28 **Table of Contents**

29 Section 1. Overview..... 3  
30 Section 2. Details to methods..... 4  
31 2.1 Definitions of variables..... 4  
32 2.2 Source of medical / health information..... 4  
33 2.3 Chart review ..... 4  
34 Section 3. Study population ..... 5  
35 Section 4. Sample size and power..... 6  
36 Section 5. Evaluation of primary regression model ..... 7  
37 Section 6. Sensitivity analyses ..... 8  
38 6.1 Primary outcome: based on chart review versus ICD-9/10 code-based..... 8  
39 6.2 Validation of exposure variable ..... 8  
40 6.3 Confounder control for preoperative ischemic cerebrovascular events ..... 8  
41 6.4 Propensity matching ..... 8  
42 6.5 Subgroup analysis and propensity matching in patients with history of echocardiogram ..9  
43 6.6 Baseline PFO-independent risk of stroke..... 9  
44 6.7 Falsification analysis ..... 10  
45 6.8 Mixed effects modeling ..... 10  
46 6.9 Missing data imputation..... 10  
47 Section 7. Exploratory analyses ..... 12  
48 7.1 Association of PFO with 30-day hospital readmission ..... 12  
49 7.2 Association of PFO with 30-day mortality ..... 12  
50 7.3 Association of PFO with perioperative ischemic stroke after discharge..... 12  
51 7.4 Association of PFO with postoperative hospital length of stay ..... 12  
52 7.5 Association of PFO with postoperative new onset atrial fibrillation ..... 13  
53 7.6 Association of PFO with postoperative myocardial infarction ..... 13

|    |             |                                                                                                           |    |
|----|-------------|-----------------------------------------------------------------------------------------------------------|----|
| 54 | 7.7         | Perioperative stroke preventive measures.....                                                             | 13 |
| 55 | 7.8         | Obstructive sleep apnea and the Score for Preoperative Prediction of Obstructive Sleep Apnea (SPOSA)..... | 13 |
| 56 |             |                                                                                                           |    |
| 57 | 7.9         | Exploratory analyses conducted at the suggestion of peer reviewers .....                                  | 13 |
| 58 | 7.9.1       | Adjustment for biases from echocardiography examination .....                                             | 13 |
| 59 | 7.9.2       | Adjustment for the heterogeneous stroke risk of different surgical services .....                         | 15 |
| 60 | 7.9.3       | Adjustment for data availability in the same healthcare system.....                                       | 15 |
| 61 | 7.9.4       | Propensity matching with adjusted caliper width .....                                                     | 15 |
| 62 | Section 8.  | Figures and tables.....                                                                                   | 16 |
| 63 | eFigure 1a. | Receiver operating characteristic (ROC) curve of the primary regression model                             | 16 |
| 64 | eFigure 1b. | Calibration plot of the primary regression model .....                                                    | 16 |
| 65 | eFigure 2.  | Power analysis for falsification tests .....                                                              | 17 |
| 66 | eFigure 3.  | Histogram of variables with missing data and the pattern of missingness .....                             | 18 |
| 67 | eTable 1.   | International classification of diseases, ninth and tenth edition (ICD-9/10)                              |    |
| 68 |             | diagnostic codes used to define exposure, outcome, and confounder variables .                             | 19 |
| 69 | eTable 2.   | Characterization of major cardiovascular and thromboembolic conditions at the                             |    |
| 70 |             | time of PFO diagnosis .....                                                                               | 23 |
| 71 | eTable 3.   | Type of surgery .....                                                                                     | 24 |
| 72 | eTable 4.   | Sample size and power calculation.....                                                                    | 25 |
| 73 | eTable 5.   | Baseline and intraoperative characteristics of subgroups stratified by baseline                           |    |
| 74 |             | PFO-independent risk of stroke.....                                                                       | 26 |
| 75 | eTable 6.   | Baseline and intraoperative characteristics of subgroups stratified by history of                         |    |
| 76 |             | echocardiography prior to surgery.....                                                                    | 28 |
| 77 | Section 9.  | References.....                                                                                           | 30 |
| 78 |             |                                                                                                           |    |

79 **Section 1. Overview**

80 In order to ensure the stability of our findings, several additional statistical analyses were performed in addition to  
81 those reported in the primary manuscript. These methodological checks confirm that our findings are robust with  
82 regards to several considered threats to our interpretation. In what follows is a detailed description of ancillary  
83 analyses, sensitivity analyses, or exploratory analyses.

84

85 **Section 2. Details to methods**

86 *2.1 Definitions of variables*

87 eTable 1 details the list of ICD-9/10 (International Classification of Diseases, Ninth/Tenth Revisions) codes used to  
88 define the exposure, outcome, and confounder variables. The presence of a preoperatively-diagnosed PFO was  
89 determined using ICD-9/10 (International Classification of Diseases, Ninth/Tenth Revisions) diagnostic codes  
90 '745.5' and 'Q21.1'. Across all variables, patients without a billing diagnosis of such within 12 months prior to  
91 surgery were considered not exposed.

92

93 *2.2 Source of medical / health information*

94 Data were obtained from the MetaVision Anesthesia Information Management System (AIMS) (iMDsoft, Dedham,  
95 MA), the Research Patient Data Registry (RPDR), and Enterprise Performance Systems Inc (EPSi) (Allscripts  
96 Healthcare) at Massachusetts General Hospital. The AIMS prospectively collects intraoperative data including  
97 physiological parameters such as blood pressure, ventilator and respiratory indices, administered drug doses, and  
98 fluid volumes. This is matched to the patients' demographic data and pre-/post-procedural condition using RPDR, a  
99 centralized clinical data warehouse that compiles health records and billing data from various Partners hospital  
100 systems specifically for research purposes. Information on hospital length of stay, costs, and readmission were  
101 collected through EPSi.

102

103 *2.3 Chart review*

104 The outcome of a perioperative ischemic stroke within 30 days of surgery was based on ICD-9/10 diagnostic codes  
105 (eTable 1) and confirmed by chart review. Review of medical records of all patients with a diagnostic coding of  
106 ischemic stroke within 30 days after surgery were conducted by a research fellow and a neurologist. The chart  
107 review was conducted with a standardized methodology in reviewing patient notes, neurologist assessments, and  
108 findings from radiological studies such as CT or MRI brain. All reviewers were blinded to PFO status.

109 Details of the stroke, including the date and timing, temporal relationship with the index surgery and with hospital  
110 discharge after index surgery, the stroke subtype by Oxford Community Stroke Project (OCSP) classification,<sup>1</sup> and  
111 the stroke-related neurological deficit measured by National Institute of Health Stroke Scale (NIHSS)<sup>2</sup> were  
112 obtained from neurology consultation notes and brain imaging reports. The OCSP stroke classification and the  
113 NIHSS were collected retrospectively in the following order of priority: as scored by neurologists in neurology  
114 notes, as recorded on reports of radiological studies, and lastly, abstracted from records. 88.6% of strokes were  
115 classified and scored at the time of stroke occurrence. When the information was abstracted from records, the raters  
116 were blinded to PFO status.

117

118 **Section 3. Study population**

119 After applying inclusion and exclusion criteria, a total of 168 621 cases were available for analysis. A total of 18  
120 423 (10.9%) were excluded from the complete case analysis due to missing values in any of the variables used in the  
121 regression model (see Section 6.9 ‘Missing data imputation’).

122 Of the 150 198 cases that underwent analysis, 1540 (1.0%) had a preoperatively-diagnosed PFO based on ICD-9/10  
123 codes. Patients with PFO were older; had a lower body mass index (BMI), higher American Society of  
124 Anesthesiologists (ASA) physical classification status, and higher Charlson comorbidity index; were more likely to  
125 have history of smoking, hypertension, diabetes mellitus, dyslipidemia, coronary artery disease, myocardial  
126 infarction, congestive heart failure, pulmonary edema, pulmonary hypertension, cardiomyopathy, congenital heart  
127 disease, atrial fibrillation, valvular heart disease, COPD, transient ischemic attack, ischemic stroke, migraine,  
128 chronic kidney disease, hypercoagulable state, deep vein thrombosis, pulmonary embolism, and systemic embolic  
129 phenomenon; had more prescriptions of beta-blockers, statins, anti-platelet agents, and anticoagulants; underwent  
130 more emergency procedures, high risk procedures, inpatient surgeries, and longer surgeries; had more intraoperative  
131 hypotensive minutes; received higher intraoperative doses of vasopressors, less intraoperative fluids, and more  
132 packed red blood cell transfusions. There was no significant difference in terms of gender, or procedural complexity  
133 measured by work RVU (Table 1).

134 Patients with PFO were more likely to have underlying major cardiovascular or thromboembolic conditions at the  
135 time of PFO diagnosis (eTable 2). Because these coexisting conditions could have biased such patients to the  
136 diagnosis of PFO through referral for a dedicated echocardiography study, all of these significant conditions were  
137 included in the confounder model for the primary analysis.

138 eTable 3 shows details of the type of surgery for patients with and without PFO. Patients with PFO underwent  
139 higher frequency counts of anesthesiology and radiology procedures, neurosurgeries, transplant surgeries, and  
140 vascular surgeries compared with patients without PFO.

141 **Section 4. Sample size and power**

142 Prior to conducting our analysis, we defined an odds ratio of 2.0 as a clinically meaningful association between PFO  
143 and perioperative ischemic stroke. Assuming the observed PFO rate of 1.0%, a one-sided alpha level of 0.025, and  
144 an event rate of 0.5% perioperative ischemic stroke within 30 days after surgery, we achieved 94.3% power to detect  
145 an odds ratio of 2.0 or greater.

146 Previous studies have examined the PFO-stroke association in smaller sample sizes, but would have had modest  
147 levels of statistical power using our event rates (eTable 4).

148

149 **Section 5. Evaluation of primary regression model**

150 In order to evaluate a multivariable model, the assumptions underlying the model and the model fit must be closely  
151 evaluated. The primary regression model for perioperative ischemic stroke was conducted using forced variable  
152 entry and evaluated using calibration tests (Hosmer-Lemeshow test) and discrimination indices (area under the  
153 curve) to ensure that the estimates could be interpreted conventionally. All continuous variables in the primary  
154 regression model were tested for linearity. Work relative values units (work RVU), intraoperative hypotensive  
155 minutes, intraoperative dose of vasopressors, and intraoperative fluid volumes were categorized in quintiles due to  
156 non-linearity of the coefficients.

157 Model discrimination was assessed through the concordance c-statistic, which in our case was equivalent to the area  
158 under the receiver operating characteristic curve (AUC=0.845) (eFigure 1a). Although the Hosmer-Lemeshow test  
159 suggested a statistically significant miscalibration ( $\chi^2=28.23$ ,  $P=0.0004$ ), this should be interpreted with caution  
160 due to the hypersensitivity of this test in large sample sizes.<sup>3</sup> Therefore, model calibration was additionally assessed  
161 through a reliability plot, which analyzed the agreement between the observed and estimated outcomes (eFigure 1b),  
162 and this evaluation indicated an acceptable fit. Model resolution was assessed by plotting a histogram of the log of  
163 the estimated values (see insert in eFigure 1a). Taken together, these findings confirmed that our primary regression  
164 model had good resolution and was well-calibrated.

165



166 **Section 6. Sensitivity analyses**

167 *6.1 Primary outcome: based on chart review versus ICD-9/10 code-based*

168 In the primary analysis, we used a chart reviewed outcome of perioperative ischemic stroke; details of the methods  
169 of obtaining the diagnosis have been reported previously (see Section 2.3 ‘Chart review’). The incidence of  
170 perioperative ischemic stroke confirmed by chart review in the entire study population was 850 (0.6%). In the  
171 sensitivity analysis, we explored whether the effect estimate remained unchanged when the outcome variable was  
172 defined using the same process of classification as other variables, that is by ICD-9/10 codes (eTable 1).

173 The incidence of the non-chart-reviewed outcome of perioperative ischemic stroke was 2155 (1.4%). The odds of  
174 experiencing a stroke in the PFO group (136/1540 [8.8%]) was greater than in the non-PFO group (2019/148 658  
175 [1.4%]); (unadjusted odds ratio [OR], 7.04; 95% CI, 5.87-8.43;  $P<.001$ ). In adjusted analysis, the association  
176 between PFO and perioperative stroke was also significant when using the ICD-based outcome (OR, 2.91; 95% CI,  
177 2.38 to 3.56;  $P<.001$ ). This resulted in estimated risks of 1.2% (95% CI, 0.1 to 1.5%) ischemic strokes in patients  
178 with PFO, and 0.4% (95% CI, 0.4 to 0.5%) in patients without PFO (adjusted absolute risk difference, 0.8%; 95% CI  
179 0.6 to 1.1%).

180

181 *6.2 Validation of exposure variable*

182 In the primary analysis, we defined PFO based on having an ICD-9/10 code for ‘patent foramen ovale’ or ‘atrial  
183 septal defect’ (ASD). Patients with a history of PFO or ASD closure were classified into the group without PFO.  
184 Since the diagnoses of PFO and ASD are not distinguishable by ICD-9/10 codes, we chart reviewed the patients  
185 with a coding diagnosis of PFO and perioperative ischemic stroke to estimate the true frequency of PFO. Of the 49  
186 patients with PFO who experienced a perioperative ischemic stroke, a total of 40 patients (81.6%) had a PFO  
187 diagnosed by transthoracic or transesophageal echocardiography, only 3 patients (6.1%) had an ASD.

188

189 *6.3 Confounder control for preoperative ischemic cerebrovascular events*

190 In the primary analysis, multivariable logistic regression was performed to evaluate the odds ratio of perioperative  
191 ischemic stroke in patients with PFO, controlling for confounding variables selected a priori based on data in the  
192 published literature and biological plausibility (details of the confounder model were listed in the Methods section).  
193 We did not control for preoperative ischemic cerebrovascular events since they may have also been associated with  
194 a PFO. However, in a sensitivity analysis, we tested whether the PFO-stroke association remained significant after  
195 including history of ischemic cerebrovascular events in the confounder model.

196 Including a history of transient ischemic attack (OR, 2.32; 95% CI, 1.70 to 3.18;  $P<.001$ ) or history of ischemic  
197 stroke (OR, 1.55; 95% CI, 1.13 to 2.14;  $P=.007$ ) in the confounder model did not change the primary study results.

198

199 *6.4 Propensity matching*

200 In the primary analysis, we categorized patients based on having a preoperative diagnosis of PFO. However, there  
201 may be subtle processes that lead to diagnosis of a PFO that were not properly considered in the multivariable  
202 confounder model. To reduce potential diagnostic bias, we first defined a new confounder control model to create a  
203 propensity score to predict PFO. Since PFO is a congenital anomaly most commonly detected during an  
204 echocardiographic examination, the covariates were selected based on probability of subjecting a patient to an  
205 echocardiography study. They included age, sex, BMI, ASA physical status classification, Charlson comorbidity  
206 index; history of cigarette smoking, hypertension, diabetes mellitus, dyslipidemia, myocardial infarction, atrial  
207 fibrillation, congestive heart failure, chronic obstructive pulmonary disease (COPD), chronic lung disease, chronic  
208 kidney disease, moderate to severe liver disease; prescription within 28 days before surgery of beta-blockers, statins,  
209 anti-platelet agents, anticoagulants; emergency surgery status, inpatient surgery, high risk surgical service,<sup>4</sup> and  
210 work RVU. The propensity model was conducted using a logistic regression model forcing all of the predictors into

211 the model (i.e., non-parsimonious model). The AUC was 0.79. Propensity score matching was then performed using  
212 the ‘Matchit’ package in R Studio, using a 1:5 matching ratio with nearest neighbor and sampling without  
213 replacement with a caliper set to 0.20.

214 Of the 1540 cases with PFO, 1521 (98.8%) were successfully matched at a 1:5 ratio. 6 (0.4%) had exactly four  
215 matches, 7 (0.5%) had exactly three matches, 2 (0.1%) had exactly two matches, and 1538 (99.9%) had at least one  
216 match. Because of the high success rate of finding a 1:5 match, we included individuals with less than a 1:5 match to  
217 avoid the loss of data.<sup>5</sup> The final propensity-score-matched cohort of 1538 patients with PFO and 7656 patients  
218 without PFO (Table 3) confirmed our primary finding of the PFO-stroke association. PFO was associated with an  
219 increased risk of stroke (49/1538 [3.2%] vs 77/7656 [1.0%]; OR, 3.16; 95% CI, 2.19 to 4.51;  $P<.001$ ). Close  
220 examination of the matched sample revealed that several variables used in the match exhibited residual imbalances  
221 (i.e. standardized mean difference  $>0.10$ ) (Table 3). To further adjust for these imbalances, these variables were  
222 forced into a post-hoc regression model in the matched sample. This analysis further confirmed the findings (OR,  
223 1.54; 95% CI, 1.04 to 2.26;  $P=.03$ ).

224

### 225 6.5 *Subgroup analysis and propensity matching in patients with history of echocardiogram*

226 We repeated the primary analysis in a subgroup including only patients with history of an echocardiogram in our  
227 institution prior to the index surgery, in order to further control for unmeasured differences that biased the referral  
228 for evaluation by echocardiogram. A total of 29 629 (19.7%) patients in the cohort had history of an echocardiogram  
229 performed in the same healthcare system based on billing codes. The primary analysis was repeated in this subgroup  
230 and confirmed the PFO-stroke association (32/1162 [2.8%] vs 335/28 467 [1.2%]; OR, 1.86; 95% CI, 1.28 to 2.72;  
231  $P=.001$ ).

232 The primary study results were replicated in further analysis with a 1:5 propensity matching of patients without and  
233 with PFO in this subgroup (using the propensity score derived in Section 6.4 ‘Propensity matching’) (OR, 1.84; 95%  
234 CI, 1.21 to 2.76;  $P=.003$ ).

235

### 236 6.6 *Baseline PFO-independent risk of stroke*

237 Previous studies have suggested that the association between PFO and stroke was stronger in patients younger than  
238 55.<sup>5,6</sup> We tested if the PFO-attributable risk of stroke differs for patients at different stroke risks.

239 We created a probability score for the risk of perioperative ischemic stroke, independent of PFO diagnosis. The  
240 variables were comorbid conditions and surgical factors selected based on their biologically-plausible relationship  
241 with stroke, and included age; sex; BMI; ASA physical status classification; Charlson comorbidity index; history of  
242 cigarette smoking, hypertension, diabetes mellitus, dyslipidemia, myocardial infarction, atrial fibrillation, COPD,  
243 migraine, or chronic kidney disease; prescription within 28 days before surgery of beta-blockers, statins, anti-platelet  
244 agents, or anticoagulants; emergency surgery status; inpatient surgery; high risk surgical service; duration of  
245 surgery; intraoperative hypotensive minutes; intraoperative dose of vasopressors; intraoperative fluid volumes;  
246 requirement for packed red blood cells transfusion; and work RVU. The AUC was 0.84.

247 The study population was subdivided by median split into two equally-sized groups – ‘low stroke risk’ and ‘high  
248 stroke risk’ – based on this baseline probability of perioperative ischemic stroke, and the PFO-stroke association was  
249 re-examined for heterogeneity across groups. 31 patients with ASA physical status class V were not included due to  
250 failure to calculate the probability score. Clinical characteristics of the two groups are presented in eTable 5.

251 The relative risk estimate of PFO on perioperative ischemic was modified by patients’ PFO-independent baseline  
252 risk of stroke (interaction term “PFO x low stroke risk”: OR, 4.59; 95% CI, 1.36 to 15.5;  $P$  for interaction $<.014$ ;  
253 interaction term “PFO x baseline stroke risk”: OR, 1.23e-26; 95% CI, 6.70e-39 to 2.26e-14;  $P$  for interaction  $<.001$ ).  
254 For individuals at low risk of stroke, the estimated probabilities of stroke with and without PFO were 1.4% (95% CI,  
255 0.2 to 2.9%) and 0.1% (95% CI, 0.1 to 0.2%); (adjusted OR, 15.92; 95% CI, 4.92 to 51.53;  $P<.001$ ). For individuals  
256 at high risk of stroke, the estimated probabilities of stroke with and without PFO were 0.8% (95% CI, 0.5 to 1.0%)

257 and 0.3% (95% CI, 0.3 to 0.4%); (adjusted OR, 3.80; 95% CI, 2.81 to 5.15;  $P<.001$ ). The PFO-attributable risk of  
258 stroke in patients at low baseline stroke risk was higher (adjusted absolute risk difference, 1.3%; 95% CI, -0.3 to  
259 2.8%) compared with patients at high baseline stroke risk (adjusted absolute risk difference, 0.5%; 95% CI, 0.2 to  
260 0.7%).

261 We also performed a subgroup analysis in a cohort excluding patients with major risk factors of stroke, such as  
262 history of hypertension, myocardial infarction, atrial fibrillation, or COPD. This group consisted of 79 649 cases  
263 (53.0%) from the study population. In these patients at lower risk of stroke based on absence of major risk factors,  
264 having a PFO was associated with an increased risk of perioperative ischemic stroke (13/410 [3.2%] vs 228/79 239  
265 [0.3%]; OR, 3.14; 95% CI, 1.66 to 5.94;  $P<.001$ ).

266

#### 267 6.7 *Falsification analysis*

268 To better ensure that the observed association between PFO and stroke was not due to some underlying cause  
269 unrelated to our mechanistic hypothesis, we examined three additional outcomes that are theoretically unrelated to  
270 the mechanism of PFO in falsification testing – septic shock, wound complication, and peptic ulcer disease. They  
271 were selected based on a common contributing etiology of non-thrombotic tissue ischemia. All outcomes were  
272 defined by ICD-9/10 diagnostic codes and within 30 days after surgery (eTable 1).

273 We performed superiority tests with high levels of power to detect even small associations. Assuming the PFO rates  
274 we observed, a one-side alpha level of 0.025, and event rates of 3.3% 1.6%, and 2.0% for septic shock, wound  
275 complications, and peptic ulcer disease respectively, we achieved 95% power to reject the null hypothesis (eFigure  
276 2). In adjusted analyses, septic shock (15 [1.0%] vs 525 [0.4%]; OR, 0.89; 95% CI, 0.52 to 1.52;  $P=.67$ ), wound  
277 complication (103 [6.7%] vs 6807 [4.6%]; OR, 0.90; 95% CI, 0.73 to 1.11;  $P=.35$ ), and peptic ulcer disease (8  
278 [0.5%] vs 492 [0.3%]; OR, 1.23; 95% CI, 0.61 to 2.49;  $P=.56$ ) were not significantly associated with having a  
279 diagnosis of PFO (Table 2). Due to sparse data in peptic ulcer disease (only 8 outcomes in patients with PFO),  
280 multivariable logistic regression was performed with a modified confounder model, consisting age, gender, body  
281 mass index, and the three most significant predictors of perioperative stroke (based on the beta-coefficients in the  
282 primary logistic regression model) – emergency surgery status, inpatient surgery, and high risk surgical service.

283

#### 284 6.8 *Mixed effects modeling*

285 The study included patients and data from three hospital sites – Massachusetts General Hospital, Mass General West  
286 – Waltham, and Mass General / North Shore Center for Outpatient Care. To account for the impact of variation from  
287 different healthcare facilities, we performed mixed effects logistic regression, with clustering within anesthesia  
288 provider specified as a random effect and other covariates as fixed effects. The anesthesia provider was chosen as a  
289 viable surrogate of the inter-hospital difference in practices, and was defined as the primary anesthetist responsible  
290 for the anesthetic care of the surgical case.

291 Data on the anesthesia provider was available for 150 188 (99.9%) of the cohort, and there were 754 individual  
292 anesthesia providers. The results of the primary analysis did not change (OR, 2.69; 95% CI, 1.97 to 3.67;  $P<.001$ ),  
293 suggesting that the primary study finding was not driven by systematic differences in the practice patterns of  
294 anesthesia providers at multiple hospital sites.

295

#### 296 6.9 *Missing data imputation*

297 The complete case method was adopted to deal with missing data in the primary statistical analysis. To better ensure  
298 that missing data did not bias the primary analysis, multiple imputation was conducted. A total of 7 variables in our  
299 primary regression model had missing data, and the pattern of missingness was examined to ensure missing at  
300 random (MAR) (eFigure 3).

301 To test the robustness of our results, the analysis was repeated with the entire cohort using the technique of multiple  
302 imputations by chained equations.<sup>8</sup> The variables with missing data were imputed using all covariates included in  
303 the primary model. Using the 'MICE' package in R Studio, 5 imputations were performed with 5 iterations per  
304 imputation. Even BMI, the variable which had the largest amount of missing data out of all included variables, had  
305 only 10 232 (6.1%) missing values. The imputed cohort included all 18 423 (10.9%) cases that were dropped due to  
306 missing values in any of the variables used in the regression model. The model estimate of PFO on risk of stroke  
307 from the imputed dataset was consistent with the complete case cohort (53/1788 [3.0%] vs 906/166 833 [0.5%]; OR,  
308 2.59; 95% CI, 1.93 to 3.48;  $P < .001$ ).

309

310 **Section 7. Exploratory analyses**

311 *7.1 Association of PFO with 30-day hospital readmission*

312 We examined whether having a PFO was associated with other burdensome clinical outcomes (Table 2). Hospital  
313 readmission was defined as an in-patient readmission to a hospital in the Partners healthcare network. There were a  
314 total of 11 597 (7.7%) cases of 30-day readmission – 245 (15.9%) in patients with PFO and 11 352 (7.6%) in  
315 patients without PFO. In multivariable analysis, having a PFO was not significantly associated with increased rate of  
316 30-day readmission (OR, 1.15; 95% CI, 0.99 to 1.33;  $P=.07$ ).

317 We further examined whether PFO was associated with emergent or unplanned admissions in particular. Having a  
318 PFO was associated with increased rate of emergent or unplanned readmission within 30 days of surgery (218/1540  
319 [14.2%] vs 9126/148 658 [6.1%]; OR, 1.20; 95% CI, 1.03 to 1.41;  $P=.02$ ).

320 We tested if having a PFO was associated with specific causes of hospital readmission. The odds of 30-day  
321 readmission due to a principle or admitting diagnosis of PFO-related complications – including ischemic stroke,  
322 systemic embolic complications, and atrial fibrillation, was higher in patients with PFO compared with patients  
323 without PFO (13/1540 [0.8%] vs 232/148 658 [0.2%]; OR, 1.93; 95% CI, 1.01 to 3.45,  $P=.03$ ).

324

325 *7.2 Association of PFO with 30-day mortality*

326 There was no difference in 30-day mortality (27 [1.8%] vs 917 [0.6%]; OR, 0.95; 95% CI, 0.63 to 1.43;  $P=.87$ )  
327 between patients with and without PFO.

328 We performed an additional time-to-event analysis to account for the competing risk of mortality within 30 days  
329 after surgery. After confirming satisfaction of the proportional hazards assumption, we conducted a Cox  
330 proportional hazards analysis using the same confounder model as in the primary analysis to model time to stroke up  
331 to 30 days after surgery. The analysis yielded results similar to the primary logistic regression model (hazard ratio  
332 [HR], 2.67; 95% CI, 1.97 to 3.61).

333

334 *7.3 Association of PFO with perioperative ischemic stroke after discharge*

335 The acquisition of the date of stroke by chart review allowed us to categorize strokes into strokes occurring during  
336 the index hospitalization or post-discharge strokes. Of the 850 perioperative ischemic strokes occurring within 30  
337 days after surgery, a total of 215 (25.3%) perioperative strokes occurred after discharge – 13 (26.5%) in patients  
338 with PFO and 202 (25.2%) in patients without PFO. Patients with PFO had an increased risk of post-discharge  
339 strokes compared with patients without PFO (13/1540 [0.8%] vs 202/148 658 [0.1%]; OR, 2.74; 95% CI, 1.52 to  
340 4.91;  $P=.001$ ).

341

342

343 *7.4 Association of PFO with postoperative hospital length of stay*

344 The association between PFO and postoperative hospital length of stay was assessed utilizing a time-to-event Cox  
345 proportional hazards model stratified by stroke. There was no difference in postoperative hospital length of stay  
346 between patients with or without PFO (median length of stay, 4 vs 3; interquartile range, 2-8 vs 1-5), regardless of  
347 whether they experienced a stroke (HR, 0.93; 95% CI, 0.67 to 1.29;  $P=.67$ ) or not (HR, 0.95; 95% CI, 0.90 to 1.00;  
348  $P=.05$ ).

349

350

351 7.5 *Association of PFO with postoperative new onset atrial fibrillation*

352 We tested whether having a PFO is associated with an increased incidence of perioperative new onset atrial  
353 fibrillation (AF) in patients without history of AF. This subgroup of patients without history of AF consisted of 136  
354 520 cases (90.9%) from the study population. In analysis adjusted for age, sex, and BMI, there was increased  
355 perioperative new onset AF in patients with PFO compared with patients without PFO (12/1087 [1.1%] vs 589/135  
356 433 [0.4%]; OR, 2.37; 95% CI, 1.33 to 4.23;  $P=.003$ ).

357

358 7.6 *Association of PFO with postoperative myocardial infarction*

359 Myocardial infarctions could be related to PFO in the circumstance of coronary artery embolism. Although ICD-  
360 9/10 diagnosis codes do not allow the distinction of myocardial infarctions from embolic origin, we tested whether  
361 having a PFO is associated with an increased incidence of postoperative myocardial infarction as a whole. In  
362 adjusted analysis, the risk of myocardial infarction was increased in patients with PFO (45 [2.9%] vs 922 [0.6%];  
363 OR, 1.60; 95% CI, 1.13 to 2.27;  $P=.008$ ) compared with patients without PFO.

364

365 7.7 *Perioperative stroke preventive measures*

366 In order to test the hypothesis that the paradoxically higher absolute estimated probability of stroke for the low risk  
367 group of patients with PFO compared with the high risk group of patients with PFO (Section 6.6 ‘Baseline PFO-  
368 independent risk of stroke’) was due to a difference in intensity of perioperative stroke preventive measures,  
369 exploratory analyses on the postoperative use of antiplatelet and anticoagulation therapy was performed. The logistic  
370 regression models adjusted for potential confounders including age; sex; BMI; ASA physical status classification;  
371 Charlson comorbidity index; and history of cigarette smoking, hypertension, diabetes mellitus, dyslipidemia,  
372 myocardial infarction, atrial fibrillation, COPD, migraine, or chronic kidney disease.

373 In adjusted analyses, the use of antiplatelet therapy (10 210/75 084 [13.6%] vs 28 015/75 083 [37.3%]; OR, 0.41;  
374 95% CI, 0.40 to 0.42;  $P<.001$ ) and anticoagulation therapy (18 940/75 084 [25.2%] vs 45 957/75 083 [61.2%]; OR,  
375 0.25; 95% CI, 0.24 to 0.26;  $P<.001$ ) in the 30 days after surgery was significantly lower in the ‘low stroke risk’  
376 group compared with the ‘high stroke risk’ group.

377

378 7.8 *Obstructive sleep apnea and the Score for Preoperative Prediction of Obstructive Sleep Apnea (SPOSA)*

379 There are data to support obstructive sleep apnea (OSA) as a modifiable risk factor for stroke.<sup>9</sup> We recently  
380 published a prediction score validated for the preoperative prediction of OSA (SPOSA).<sup>10</sup> In unadjusted analysis, a  
381 high SPOSA – defined as SPOSA  $\geq 25$  – was not associated with an increased risk of perioperative ischemic stroke  
382 (274/46 421 [0.6%] vs 576/103 777 [0.6%]; OR, 1.06; 95% CI, 0.92 to 1.23;  $P=.40$ ). Adding the dichotomized  
383 SPOSA to the confounder model did not change the primary study findings of the PFO-stroke association (OR, 2.67;  
384 95% CI, 1.96 to 3.63;  $P<.001$ ).

385

386 7.9 *Exploratory analyses conducted at the suggestion of peer reviewers*

387 7.9.1 *Adjustment for biases from echocardiography examination*

388 To address possible residual confounding related to biases in referral for certain types of echocardiography,  
389 or to ascertainment biases due to the different diagnostic sensitivities of these echocardiography  
390 examinations for PFO, we conducted sensitivity analyses in the group of patients with history of an  
391 echocardiogram performed in the same healthcare system prior to the index surgery (refer to Section 6.5  
392 ‘Subgroup analysis and propensity matching in patients with history of echocardiogram’). Amongst these  
393 patients, we identified subgroups who had undergone prior to surgery a test considered more sensitive for

394 the diagnosis of PFO - transesophageal echocardiography (TEE) and echocardiography with agitated saline  
395 injection.

396 1. TEE: We identified patients who received a TEE based on Current Procedural Terminology (CPT) codes.  
397 TEE was defined by the following CPT codes: '93312', '93313', '93314', '93315', '93316', '93317',  
398 '93318', or '93355'. A total of 4094 patients in our cohort had a TEE performed in the same healthcare  
399 system at any time prior to surgery. The frequency of PFO, defined as having any ICD-9/10 diagnoses of  
400 PFO made prior to surgery, in these patients with TEE prior to surgery was 904 (22.1%). PFO was  
401 associated with an increased risk of perioperative ischemic stroke (37/904 [4.1%] vs 44/3190 [1.4%];  
402 unadjusted OR, 3.05; 95% CI, 1.96 to 4.75;  $P<.001$ ; adjusted OR, 2.06; 95% CI, 1.15 to 3.68;  $P=.02$ ).

403 2. Echocardiography with agitated saline injection: Since CPT codes cannot be used to identify dedicated  
404 studies conducted with agitated saline ('bubbles studies'), we used text search in Partners HealthCare notes  
405 and validated this new approach using chart review. We applied a text search function to all  
406 echocardiography notes from the Partners HealthCare network retrievable through RPDR, with the  
407 following search phrases: 'agitated saline', 'bubble', 'contrast', 'cTTE', and 'cTEE', 'Definity'; to identify  
408 patients who underwent bubble studies.

409 To minimize the effect of less specific data returned from the text search method, we performed a chart  
410 review of 200 randomly-selected patients from the cohort with an echocardiography performed in the  
411 Partners HealthCare system - 100 each with and without 'bubble studies', respectively. Each case was  
412 independently analyzed by two scientists blinded to the result of the automated text search, by reviewing  
413 the echocardiography reports obtained within the Partners HealthCare system at any point prior to surgery.  
414 The results show an excellent agreement (94.0%) between the output from the automated text search and  
415 the results by chart review. The minimal level of disagreement was due to the higher granularity of  
416 timestamps during individual clinical chart review, which allowed for further identification of bubble  
417 studies performed prior to surgery on the same day.

418 A total of 4043 patients in our cohort had a bubble study performed at Partners HealthCare at any time  
419 prior to surgery. The frequency of PFO in this subgroup was 1139 (28.2%). PFO was associated with an  
420 increased risk of perioperative ischemic stroke (45/1139 [4.0%] vs 67/2904 [2.3%]; unadjusted OR, 1.74;  
421 95% CI, 1.19 to 2.56;  $P=.005$ ; adjusted OR, 1.86; 95% CI, 1.26 to 2.74;  $P=.002$ ).

422 3. TTE with bubbles vs TEE with bubbles: The rates of TTE with bubbles vs TEE with bubbles in patients  
423 with and without PFO were 4.4:1 and 3.3:1, respectively. Following inclusion of the mode of  
424 echocardiography into the primary multivariable model, the unique PFO-stroke association remained  
425 significant (OR, 2.52; 95% CI, 1.85 to 3.44;  $P<.001$ ).

426 Of the 4043 patients with a bubble study prior to surgery, a total of 1140 patients had the bubble study  
427 during a TEE. In this subgroup, the frequency of PFO was 460 (40.4%), with a similarly significant  
428 association between a preoperative diagnosis of PFO and an increased risk of perioperative ischemic stroke  
429 (26/460 [5.7%] vs 10/680 [1.5%]; unadjusted OR, 4.01; 95% CI, 1.92 to 8.41;  $P<.001$ ; adjusted OR, 4.01;  
430 95% CI, 1.91 to 8.42;  $P<.001$ ). A total of 3948 patients had a bubble study during a TTE. In this subgroup,  
431 the frequency of PFO was 1115 (28.2%). PFO was also associated with a significantly increased risk of  
432 stroke in this subgroup (43/1115 [3.9%] vs 65/2833 [2.3%]; unadjusted OR, 1.71; 95% CI, 1.15 to 2.53;  
433  $P=.007$ ; adjusted OR, 1.83; 95% CI, 1.23 to 2.71;  $P=.003$ ).

434 Of note, due to the relatively small number of outcomes observed under (2) and (3), we did not apply the  
435 full confounder model (38 covariates). Instead, we built a propensity score for the PFO-independent  
436 baseline risk of stroke, which includes all significant comorbidities and procedural risk factors for  
437 perioperative stroke (see Section 6.6 'Baseline PFO-independent risk of stroke' in the Supplement). For  
438 this approach, we used a model-based adjustment and forced this score into the primary model.

439 4. Additional falsification testing: We identified an echocardiographic finding – tricuspid valve disorders –  
440 that should not be directly associated with increased stroke risk, and analyzed its association with  
441 perioperative stroke in the complete case cohort as well as the cohort with history of echocardiography.  
442 Since tricuspid valve disorders is collinear with 'valvular heart disease' – one of the confounders included

443 in the primary model, the variable ‘valvular heart disease other than tricuspid valve disorders’ was used  
444 instead in the falsification analysis. Tricuspid valve disorders were not associated with an increased risk of  
445 perioperative stroke either in the complete case cohort (72/4919 [1.5%] vs 778/145 279 [0.5%]; adjusted  
446 OR, 0.99; 95% CI, 0.75 to 1.30;  $P=.93$ ), nor in the subgroup that received an echocardiogram (67/4548  
447 [1.5%] vs 300/25 081 [1.2%]; adjusted OR, 0.89; 95% CI, 0.66 to 1.19;  $P=0.43$ ).

448

#### 449 7.9.2 *Adjustment for the heterogeneous stroke risk of different surgical services*

450 The study included adult patients undergoing surgical procedures with different stroke risks (eTable 3).  
451 Only cardiac surgeries were excluded from the cohort. In order to further exclude procedures where  
452 occurrence of perioperative stroke may be a direct risk of the procedure, we performed a separate analysis  
453 excluding patients who underwent neurosurgeries and vascular surgeries. In multivariable adjusted analysis  
454 of this “low risk procedure” cohort (n=131 079) using the primary confounder model, the PFO-stroke  
455 association was replicated (24/1203 [2.0%] vs 353/129 876 [0.3%]; OR, 2.42; 95% CI, 1.56 to 3.75;  
456  $P<.001$ ).

457

#### 458 7.9.3 *Adjustment for data availability in the same healthcare system*

459 Data available regarding preoperative diagnoses of patients may be related to the duration of their care in  
460 the same healthcare system. In the primary analysis, we adopted the complete case method, where we  
461 excluded all cases with missing data in any of the covariates. Of the 150 198 cases included in the complete  
462 case cohort, 9352 (6.2%) had records only starting from the surgical admission, 140 846 (93.8%) had  
463 records prior to the surgical admission - of whom 82 848 (55.2% of the cohort) had records beyond 1 year  
464 prior to surgery. As a sensitivity measure, we performed an additional analysis in patients who were treated  
465 in the Partners HealthCare network for more than 1 year prior to surgery. In this subgroup, the PFO-stroke  
466 associated remained significant (25/1096 [2.3%] vs 408/81 752 [0.5%]; OR, 2.10; 95% CI, 1.38 to 3.22;  
467  $P=.001$ ).

468

#### 469 7.9.4 *Propensity matching with adjusted caliper width*

470 The choice of caliper width used in propensity matching has received considerable attention in the literature  
471 but still poses uncertainty amongst practicing analysts (i.e. bias versus proper CI coverage). In the initial  
472 propensity matching, we used a caliper width of 0.20 as this seemed to represent a balance between bias  
473 and precision in the matched sample.

474 Since we have ample match candidates for our cases, we re-estimated our matching procedure using a  
475 narrower caliper. Propensity score matching was performed using the ‘Matchit’ package in R Studio, using  
476 a 1:5 matching ratio with nearest neighbor and sampling without replacement with a caliper set to 0.10.

477 Of the 1540 cases with PFO, 1518 (98.6%) were successfully matched at a 1:5 ratio. 6 (0.4%) had exactly  
478 four matches, 2 (0.1%) had exactly three matches, 8 (0.5%) had exactly two matches, and 1536 (99.7%)  
479 had at least one match. The final propensity-score-matched cohort of 1536 patients with PFO and 7638  
480 patients without PFO confirmed the findings obtained using the wider caliper. PFO was associated with an  
481 increased risk of stroke (49/1536 [3.2%] vs 88/7638 [1.2%]; OR, 2.83; 95% CI, 1.97 to 4.01;  $P<.001$ ).



483 **eFigure 1a. Receiver operating characteristic (ROC) curve of the primary**  
484 **regression model for perioperative ischemic stroke.**

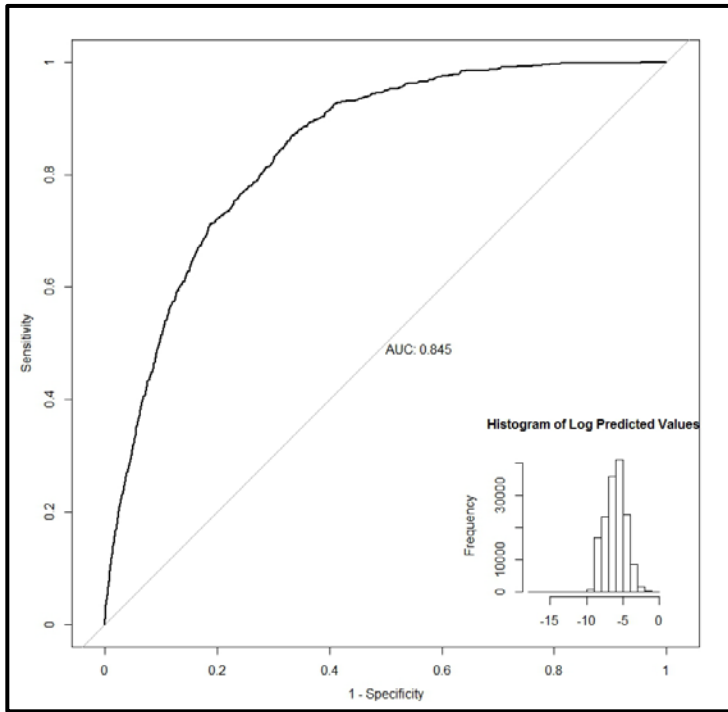

485

486 **eFigure 1b. Calibration plot of the primary regression model.**

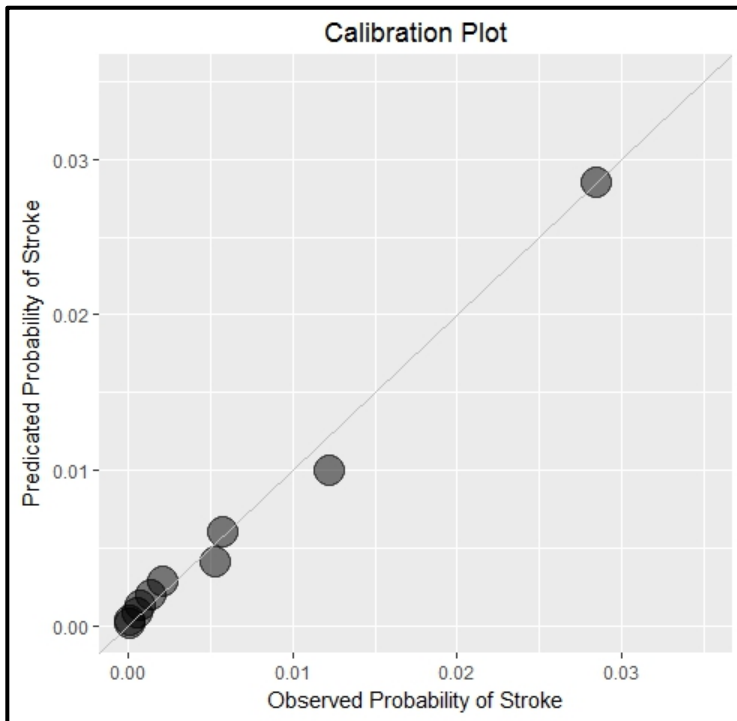

487  
488

Each data marker represents a decile of the predicted probability of stroke.

489 **eFigure 2. Power analysis for falsification tests.**

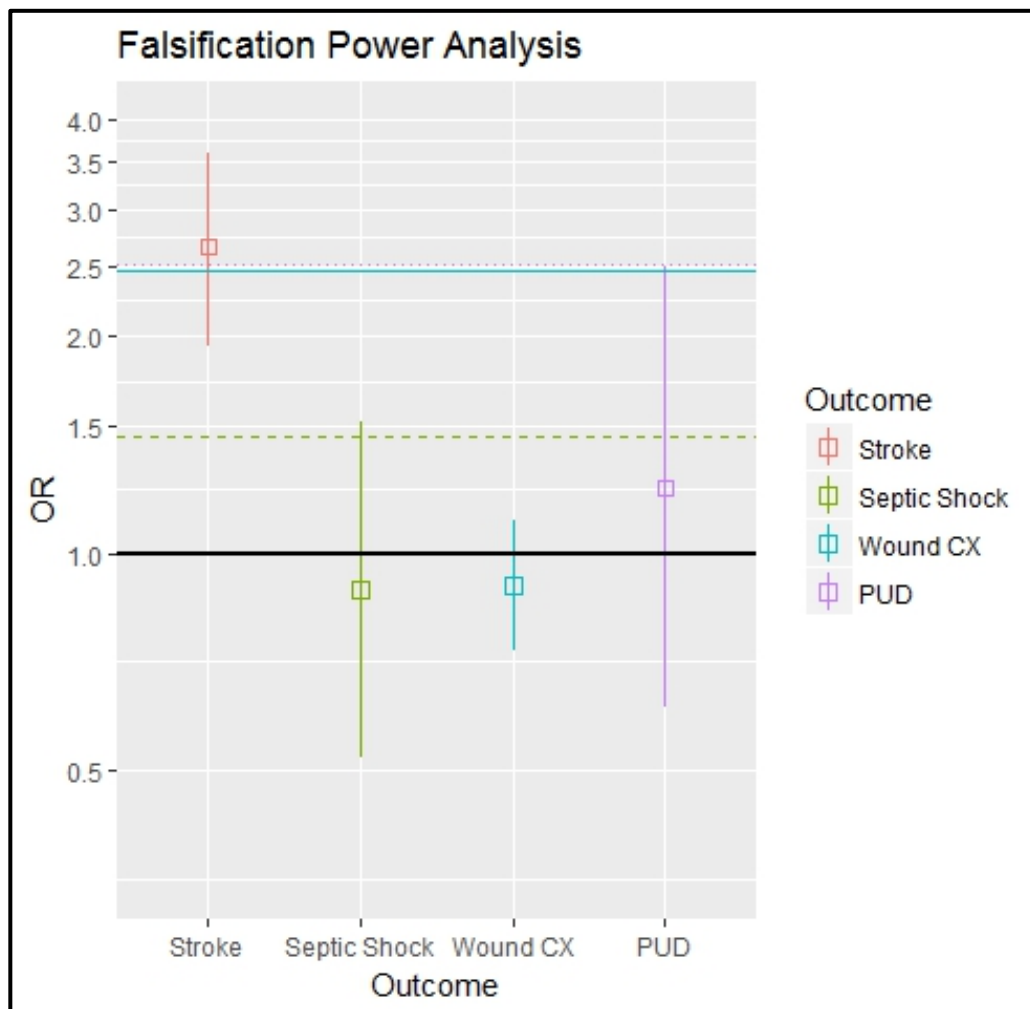

490  
491 Abbreviations: Wound CX, wound complication; PUD, peptic ulcer disease.

492 The three postoperative outcomes (green, blue, and purple) for falsifications tests were selected based on a common contributing  
493 etiology of non-thrombotic tissue ischemia, but biologically unlikely related to the presence or absence of PFO. The stroke outcome  
494 (red) is depicted for visual comparison. The colored horizontal lines in the figure depict the smallest association for which there was  
495 95% power to reject the null hypothesis, based on the observed event rate for each of these three outcomes. The point estimates  
496 (open squares) and error bars represent the adjusted odds ratios together with 95% confidence intervals for the three falsification  
497 tests. For example, there was 95% power to detect an odds ratio as small as 1.4 for the outcome of septic shock (green horizontal  
498 line), yet the adjusted odds ratio for the PFO-septic shock association was 0.89 (95% CI, 0.52 to 1.52). Despite being well-powered,  
499 none of the falsification tests were statistically significant, nor were the effect sizes likely to be clinically significant.

500  
501

**eFigure 3. Histogram of variables with missing data and the pattern of missingness.**

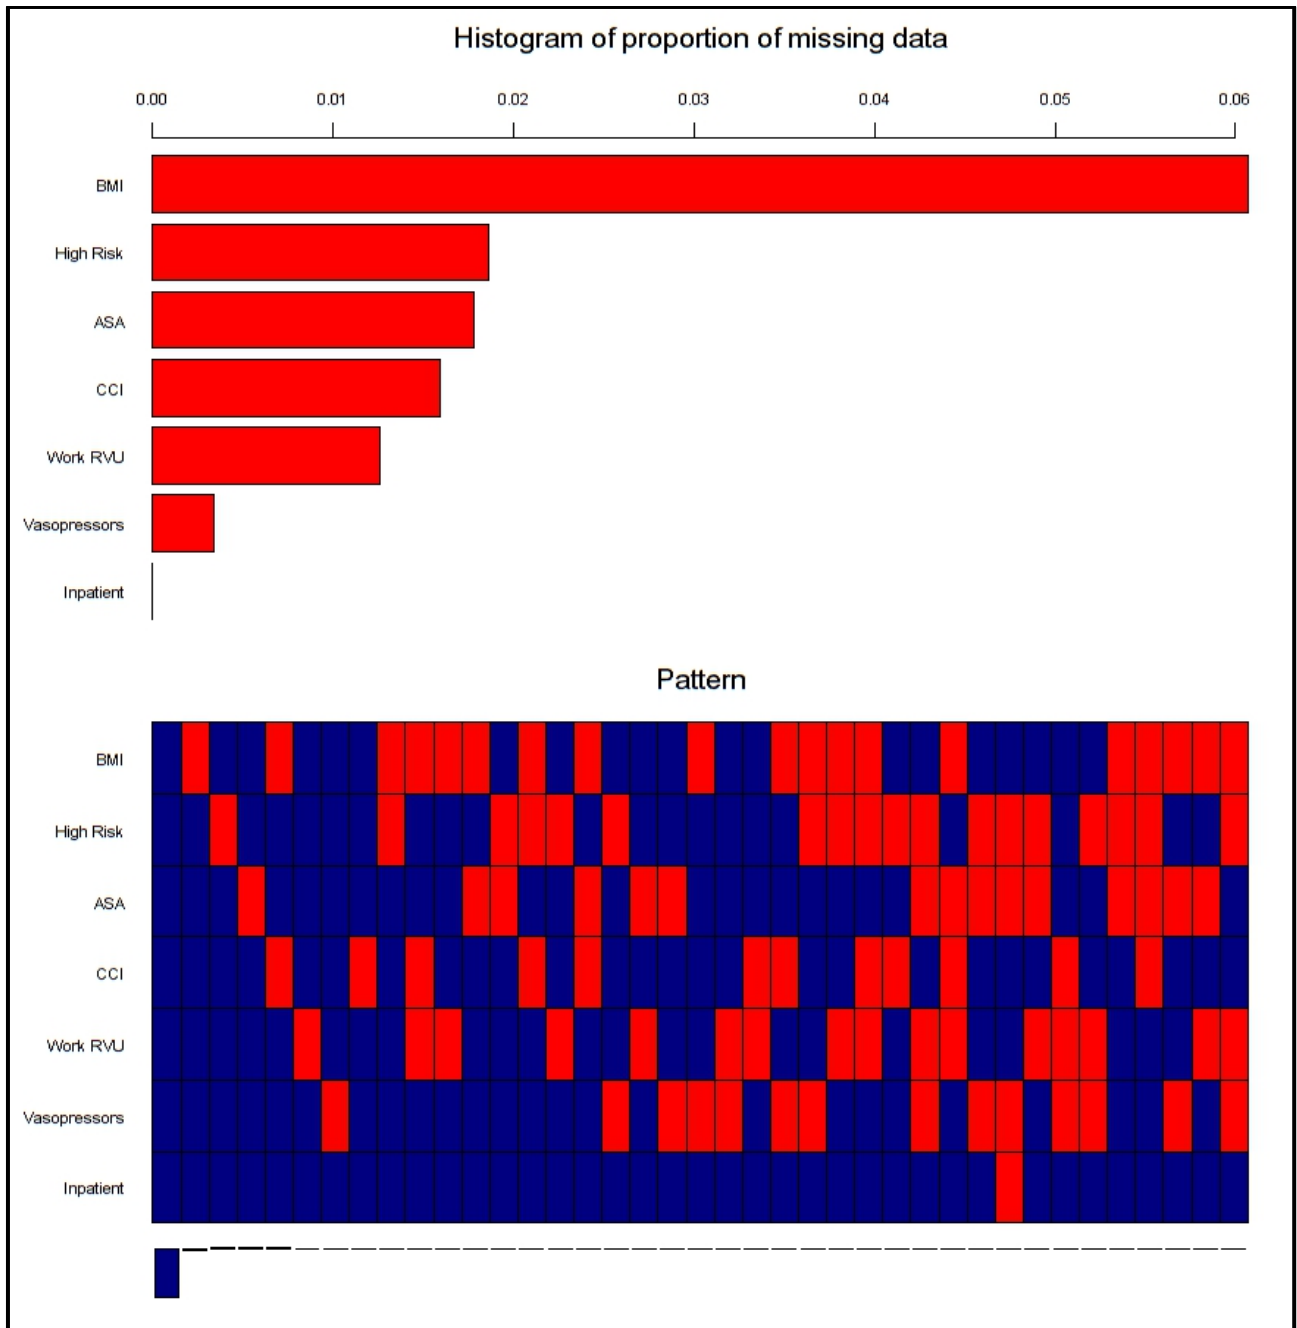

502

503 7 variables had missing data: body mass index (BMI), high risk surgical service (High Risk), American Society of Anesthesiologists  
504 physical status classification (ASA), Charlson comorbidity index (CCI), work relative value units (work RVU), intraoperative dose of  
505 vasopressors (Vasopressors), and inpatient surgery (Inpatient). The top panel shows the proportion (of 1.0) of missing data. The  
506 bottom panel shows the patterns of missingness (cells in blue denotes complete data, while cells in red denotes missing data for the  
507 respective variable): from the most frequent pattern of missingness on the leftmost column (no missing data in any of the 7  
508 variables), to the least frequent on the rightmost column (missing data for the variables BMI, High Risk, Work RVU, and  
509 Vasopressors). The histogram at the very bottom depicts the corresponding frequency of each pattern of missingness.

510

511 **eTable 1. International classification of diseases, ninth and tenth edition (ICD-**  
 512 **9/10) diagnostic codes used to define exposure, outcome, and**  
 513 **confounder variables.**

| Variable                                    | ICD-9 code | ICD-10 code                                        | Description                                                              |
|---------------------------------------------|------------|----------------------------------------------------|--------------------------------------------------------------------------|
| Patent foramen ovale / atrial septal defect | 745.5      | Q21.1                                              | Patent foramen ovale or atrial septal defect                             |
| Other possible right-to-left shunt          | 745.4      | Q21.0                                              | Ventricular septal defect                                                |
|                                             |            | Q21.2                                              | Atrioventricular septal defect                                           |
|                                             | 746.89     | Q24.8                                              | Other specified congenital malformations of heart                        |
|                                             | 746.9      | Q20.9                                              | Congenital malformation of cardiac chambers and connections, unspecified |
|                                             |            | Q24.9                                              | Congenital malformation of heart, unspecified                            |
| 747.39                                      | Q25.79     | Other congenital malformations of pulmonary artery |                                                                          |
| Ischemic stroke                             | 433.X1     | I63                                                | Cerebral infarction                                                      |
|                                             | 434.X1     |                                                    |                                                                          |
|                                             | 437.1      | I67.81                                             | Acute cerebrovascular insufficiency                                      |
|                                             | 437.9      | I67.89                                             | Other cerebrovascular disease                                            |
| I67.9                                       |            | Cerebrovascular disease, unspecified               |                                                                          |
| Transient ischemic attack                   | 435.X      | G45.0                                              | Vertebro-basilar artery syndrome                                         |
|                                             |            | G45.1                                              | Carotid artery syndrome (hemispheric)                                    |
|                                             |            | G45.8                                              | Other transient cerebral ischemic attacks and related syndromes          |
| Smoking                                     | 305.1      | F17.XXX                                            | Nicotine dependence                                                      |
|                                             | V15.82     | Z87.891                                            | Personal history of nicotine dependence                                  |
| Hypertension                                | 401.XX     | I10                                                | Essential (primary) hypertension                                         |
| Diabetes mellitus                           | 250.XX     | E10.X                                              | Type 1 diabetes mellitus                                                 |
|                                             |            | E11.X                                              | Type 2 diabetes mellitus                                                 |
|                                             |            | E13.X                                              | Other specified diabetes mellitus                                        |
| Dyslipidemia                                | 272.X      | E78.X                                              | Disorders of lipoprotein metabolism and other lipidemias                 |

514

| <b>Variable</b>          | <b>ICD-9 code</b> | <b>ICD-10 code</b>                                                                                                | <b>Description</b>                                           |                                         |
|--------------------------|-------------------|-------------------------------------------------------------------------------------------------------------------|--------------------------------------------------------------|-----------------------------------------|
| Coronary artery disease  | 410.XX            | I21.X                                                                                                             | STEMI and NSTEMI                                             |                                         |
|                          |                   | I22.X                                                                                                             | Subsequent STEMI and NSTEMI                                  |                                         |
|                          | 411.1             | I20.X                                                                                                             | Angina pectoris                                              |                                         |
|                          | 411.8X            |                                                                                                                   |                                                              |                                         |
|                          | 412               | I25.2                                                                                                             | Old myocardial infarction                                    |                                         |
|                          | 413.0             |                                                                                                                   |                                                              |                                         |
|                          | 413.9             |                                                                                                                   |                                                              |                                         |
|                          | 414.XX            | I25.1XX                                                                                                           | Atherosclerotic heart disease of native coronary artery      |                                         |
|                          |                   | I25.5                                                                                                             | Ischemic cardiomyopathy                                      |                                         |
|                          |                   | I25.6                                                                                                             | Silent myocardial ischemia                                   |                                         |
|                          | I25.7XX           | Atherosclerosis of coronary artery bypass graft(s) and coronary artery of transplanted heart with angina pectoris |                                                              |                                         |
|                          | I25.8XX           | Other forms of chronic ischemic heart disease                                                                     |                                                              |                                         |
|                          | I25.9             | Chronic ischemic heart disease, unspecified                                                                       |                                                              |                                         |
| Myocardial infarction    | 410.XX            | I21.X                                                                                                             | STEMI and NSTEMI                                             |                                         |
|                          |                   | I22.X                                                                                                             | Subsequent STEMI and NSTEMI                                  |                                         |
|                          | 411.89            | I24.8                                                                                                             | Other forms of acute ischemic heart disease                  |                                         |
| Congestive heart failure | 428.XX            | I50.X                                                                                                             | Heart failure                                                |                                         |
| Pulmonary edema          | 428.1             | I50.1                                                                                                             | Left ventricular failure                                     |                                         |
|                          |                   | 518.4                                                                                                             | J81.0                                                        | Acute pulmonary edema                   |
|                          |                   | 514                                                                                                               | J81.1                                                        | Chronic pulmonary edema                 |
| Pulmonary hypertension   | 415.0             | I26.0                                                                                                             | Pulmonary embolism with acute cor pulmonale                  |                                         |
|                          |                   | 416.8                                                                                                             | I27.2                                                        | Other secondary pulmonary hypertension  |
|                          | 416.9             | I27.81                                                                                                            | Cor pulmonale (chronic)                                      |                                         |
|                          | 416.0             | I27.0                                                                                                             | Primary pulmonary hypertension                               |                                         |
| Cardiomyopathy           | 425.X             | I42.X                                                                                                             | Cardiomyopathy                                               |                                         |
|                          | 425.8             | I43                                                                                                               | Cardiomyopathy in diseases classified elsewhere              |                                         |
| Congenital heart disease | 745.X             | Q20.X                                                                                                             | Congenital malformations of cardiac chambers and connections |                                         |
|                          |                   | Q21.X                                                                                                             | Congenital malformations of cardiac septa                    |                                         |
|                          |                   | Q22.X                                                                                                             | Congenital malformations of pulmonary and tricuspid valves   |                                         |
|                          |                   | Q23.X                                                                                                             | Congenital malformations of aortic and mitral valves         |                                         |
|                          |                   | 746.X                                                                                                             | Q24.X                                                        | Other congenital malformations of heart |
| Eisenmenger's syndrome   | 745.4             | I27.89                                                                                                            | Eisenmenger's syndrome                                       |                                         |
| Atrial fibrillation      | 427.3X            | I48.X                                                                                                             | Atrial fibrillation and flutter                              |                                         |

| <b>Variable</b>                       | <b>ICD-9 code</b> | <b>ICD-10 code</b> | <b>Description</b>                                               |
|---------------------------------------|-------------------|--------------------|------------------------------------------------------------------|
| Valvular heart disease                | 394.X             | I05.X              | Rheumatic mitral valve diseases                                  |
|                                       | 395.X             | I06.X              | Rheumatic aortic valve diseases                                  |
|                                       | 397.X             | I07.X              | Rheumatic tricuspid valve diseases                               |
|                                       | 396.X             | I08.X              | Multiple valve diseases                                          |
|                                       | 424.0             | I34.X              | Nonrheumatic mitral valve disorders                              |
|                                       | 424.1             | I35.X              | Nonrheumatic aortic valve disorders                              |
|                                       | 424.2             | I36.X              | Nonrheumatic tricuspid valve disorders                           |
|                                       | 424.3             | I37.X              | Nonrheumatic pulmonary valve disorders                           |
| Chronic obstructive pulmonary disease | 490               | J40                | Bronchitis, not specified as acute or chronic                    |
|                                       | 491.XX            | J41.X              | Simple and mucopurulent chronic bronchitis                       |
|                                       | 492.X             | J42                | Unspecified chronic bronchitis                                   |
|                                       | 496               | J43.X<br>J44.X     | Emphysema<br>Other chronic obstructive pulmonary disease         |
| Migraine                              | 346.XX            | G43.X              | Migraine                                                         |
| Chronic kidney disease                | 585.X             | N18.X              | Chronic kidney disease                                           |
|                                       | 586               | N19                | Unspecified kidney failure                                       |
| Hypercoagulable state                 | 273.3             | C88.0              | Waldenstrom macroglobulinemia                                    |
|                                       | 289.81            | D68.5X             | Primary thrombophilia                                            |
|                                       | 289.82            | D68.6X             | Other thrombophilia                                              |
|                                       | 289.89            |                    | Other specified diseases of blood and blood-forming organs       |
|                                       | 286.9             | D68.9              | Coagulation defect, unspecified                                  |
| Deep vein thrombosis                  | 453.4X            | I82.4XX            | Acute embolism and thrombosis of deep veins of lower extremity   |
|                                       | 453.5X            | I82.5XX            | Chronic embolism and thrombosis of deep veins of lower extremity |
|                                       | 453.79            | I82.891            | Chronic embolism and thrombosis of other specified veins         |
|                                       | 453.89            | I82.890            | Acute embolism and thrombosis of other specified veins           |
|                                       | 453.9             | I82.9X             | Embolism and thrombosis of unspecified vein                      |
| Pulmonary embolism                    | 415.1X            | I26.0X             | Pulmonary embolism with acute cor pulmonale                      |
|                                       |                   | I26.9X             | Pulmonary embolism without acute cor pulmonale                   |
|                                       | 416.2             | I27.82             | Chronic pulmonary embolism                                       |

| <b>Variable</b>          | <b>ICD-9 code</b> | <b>ICD-10 code</b>                          | <b>Description</b>                                          |
|--------------------------|-------------------|---------------------------------------------|-------------------------------------------------------------|
| Systemic embolism        | 289.59            | D73.5                                       | Infarction of spleen                                        |
|                          | 362.3X            | H34.0X                                      | Transient retinal artery occlusion                          |
|                          |                   | H34.1X                                      | Central retinal artery occlusion                            |
|                          |                   | H34.2XX                                     | Other retinal artery occlusions                             |
|                          | 444.21            | I74.2                                       | Embolism and thrombosis of the upper extremities            |
|                          |                   | 444.22                                      | I74.3                                                       |
|                          |                   |                                             | I74.4                                                       |
|                          | 444.89            | I74.8                                       | Embolism and thrombosis of other arteries                   |
|                          | 444.9             | I74.9                                       | Embolism and thrombosis of unspecified artery               |
|                          |                   |                                             | I74.X                                                       |
| 557.0                    | K55.0XX           | Acute vascular disorders of intestine       |                                                             |
| 557.9                    | K55.9             | Vascular disorder of intestine, unspecified |                                                             |
| 593.81                   | N28.0             | Ischemia and infarction of kidney           |                                                             |
| Septic shock             | 785.52            | R65.21                                      | Severe sepsis with septic shock                             |
|                          | 998.02            | T81.12XX                                    | Postprocedural septic shock                                 |
| Wound complication       | 998.3X            | T81.3XXX                                    | Disruption of wound, not elsewhere classified               |
|                          | 998.59            | T81.4XXX                                    | Infection following a procedure                             |
|                          | 998.6             | T81.83XX                                    | Persistent postprocedural fistula                           |
|                          | 998.83            | T81.89XX                                    | Other complications of procedures, not elsewhere classified |
| Peptic ulcer             | 531               | K25                                         | Gastric ulcer                                               |
|                          | 532               | K26                                         | Duodenal ulcer                                              |
|                          | 533               | K27                                         | Peptic ulcer, site unspecified                              |
| Tricuspid valve diseases | 397.0             | I07.X                                       | Rheumatic tricuspid valve diseases                          |
|                          |                   | I36.X                                       | Nonrheumatic tricuspid valve disorders                      |

517 Abbreviations: STEMI, ST-elevation myocardial infarction; NSTEMI, non-ST-elevation myocardial infarction.

518 **eTable 2. Characterization of major cardiovascular and thromboembolic**  
519 **conditions at the time of PFO diagnosis.**

| Disease condition                               | ICD-9 codes                                                            | ICD-10 codes                                                               | Condition present upon PFO diagnosis, No. (%) |
|-------------------------------------------------|------------------------------------------------------------------------|----------------------------------------------------------------------------|-----------------------------------------------|
| <b>Atherosclerotic cardiovascular diseases</b>  |                                                                        |                                                                            |                                               |
| Hypertension                                    | 401.XX                                                                 | I10                                                                        | 1019 (66.2)                                   |
| Coronary artery disease                         | 411.1, 411.8X, 412, 413.0, 413.9, 414.XX                               | I21.X, I22.X, I20.X, I25.2, I25.1XX, I25.5, I25.6, I25.7XX, I25.8XX, I25.9 | 612 (39.7)                                    |
| Myocardial infarction                           |                                                                        |                                                                            |                                               |
| - Any                                           | 410.XX, 411.89                                                         | I21.X, I22.X, I24.8                                                        | 187 (12.1)                                    |
| - NSTEMI                                        | 410.7X, 411.89                                                         | I21.4, I22.2, I24.8                                                        | 108 (7.0)                                     |
| - STEMI                                         | 410.0X, 410.1X, 410.2X, 410.3X, 410.4X, 410.5X, 410.6X, 410.8X, 410.9X | I21.0X, I21.1X, I21.2X, I21.3, I22.0, I22.1, I22.8, I22.9                  | 130 (8.4)                                     |
| Transient ischemic attack                       | 435.X                                                                  | G45.0, G45.1, G45.8                                                        | 181 (11.8)                                    |
| Ischemic stroke                                 | 433.X1, 434.X1, 437.1, 437.9                                           | I63, I67.81, I67.89, I67.9                                                 | 366 (23.8)                                    |
| <b>Other major cardiovascular diseases</b>      |                                                                        |                                                                            |                                               |
| Atrial fibrillation                             | 427.3X                                                                 | I48.X                                                                      | 439(28.5)                                     |
| Congestive heart failure                        |                                                                        |                                                                            |                                               |
| - Any                                           | 428.XX                                                                 | I50.X                                                                      | 502 (32.6)                                    |
| - Systolic heart failure                        | 428.2                                                                  | I50.2                                                                      | 19 (1.2)                                      |
| - Diastolic heart failure                       | 428.3                                                                  | I50.3                                                                      | 86 (5.6)                                      |
| - Combined systolic and diastolic heart failure | 428.4                                                                  | I50.4                                                                      | 3 (0.2)                                       |
| Pulmonary edema                                 | 428.1, 518.4, 514                                                      | I50.1, J81.0, J81.1                                                        | 514 (33.4)                                    |
| Pulmonary hypertension                          | 415.0, 416.8, 416.9, 416.0                                             | I26.0, I27.2, I27.81, I27.0                                                | 184 (12.0)                                    |
| Cardiomyopathy                                  |                                                                        |                                                                            |                                               |
| - Any                                           | 425.X                                                                  | I42.X, I43                                                                 | 294 (19.1)                                    |
| - Dilated                                       | 425.4                                                                  | I42.0                                                                      | 270 (17.5)                                    |
| - Hypertrophic                                  | 425.1                                                                  | I42.1, I42.2                                                               | 12 (0.8)                                      |
| - Alcoholic                                     | 425.5                                                                  | I42.6                                                                      | 5 (0.3)                                       |
| Congenital heart disease                        | 745.X, 746.X                                                           | Q20.X, Q21.X, Q22.X, Q23.X, Q24.X                                          | 93 (6.0)                                      |
| Eisenmenger's syndrome                          | 745.4                                                                  | I27.89                                                                     | 26 (1.7)                                      |
| Valvular heart disease                          |                                                                        |                                                                            |                                               |
| - Any                                           |                                                                        |                                                                            | 976 (63.4)                                    |
| - Mitral valve                                  | 394.X, 396.X, 424.0                                                    | I05.X, I34.X                                                               | 706 (45.8)                                    |
| - Aortic valve                                  | 395.X, 396.X, 424.1                                                    | I06.X, I35.X                                                               | 453 (29.4)                                    |
| - Tricuspid valve                               | 424.2                                                                  | I07.X, I36.X                                                               | 115 (7.5)                                     |
| - Pulmonary valve                               | 424.3                                                                  | I37.X                                                                      | 115 (7.5)                                     |
| COPD                                            | 490, 491.XX, 492.X, 496                                                | J40, J41.X, J42, J43.X, J44.X                                              | 343 (22.3)                                    |
| <b>Thromboembolic disease</b>                   |                                                                        |                                                                            |                                               |
| Hypercoagulable state                           | 273.3, 289.81, 289.82, 289.89, 286.9                                   | C88.0, D68.5X, D68.6X, D68.9                                               | 540 (35.1)                                    |
| Deep vein thrombosis                            | 453.4X, 453.5X, 453.79, 453.89, 453.9                                  | I82.4XX, I82.5XX, I82.891, I82.890, I82.9X                                 | 184 (12.0)                                    |
| Pulmonary embolism                              | 415.1X, 416.2                                                          | I26.0X, I26.9X, I27.82                                                     | 134 (8.7)                                     |
| Systemic embolism                               | 289.59, 362.3X, 444.21, 444.22, 444.89, 444.9, 557.0, 557.9, 593.81    | D73.5, H34.0X, H34.1X, H34.2XX, I74.2, I74.3, I74.4, I74.8, I74.9,         | 272 (17.7)                                    |



520 Abbreviations: NSTEMI, non-ST-elevation myocardial infarction; STEMI, ST-elevation myocardial infarction; COPD, chronic  
521 obstructive pulmonary disease.

522 **eTable 3. Type of surgery.**

| Type of surgery, No. (%)  | Total study population<br>(n = 150 198) | PFO<br>(n = 1540) | No PFO<br>(n = 148 658) |
|---------------------------|-----------------------------------------|-------------------|-------------------------|
| Anesthesiology            | 6676 (4.4)                              | 191 (12.4)        | 6485 (4.4)              |
| Burn                      | 1999 (1.3)                              | 11 (0.7)          | 1988 (1.3)              |
| Emergent / urgent surgery | 6143 (4.1)                              | 59 (3.8)          | 6084 (4.1)              |
| General surgery           | 25247 (16.8)                            | 181 (11.8)        | 25066 (16.9)            |
| Gynecology                | 12112 (8.1)                             | 69 (4.5)          | 12043 (8.1)             |
| Neurosurgery              | 14051 (9.4)                             | 219 (14.2)        | 13832 (9.3)             |
| Oral / maxillofacial      | 3306 (2.2)                              | 12 (0.8)          | 3294 (2.2)              |
| Orthopedic surgery        | 26757 (17.8)                            | 210 (13.6)        | 256547 (17.9)           |
| Other                     | 2147 (1.4)                              | 38 (2.5)          | 2109 (1.4)              |
| Otolaryngology            | 1046 (0.7)                              | 3 (0.2)           | 1043 (0.7)              |
| Plastic surgery           | 7597 (5.1)                              | 34 (2.2)          | 7563 (5.1)              |
| Radiology                 | 1727 (1.2)                              | 51 (3.3)          | 1676 (1.3)              |
| Surgical oncology         | 9630 (6.4)                              | 55 (3.6)          | 9575 (6.4)              |
| Thoracic surgery          | 10962 (7.3)                             | 123 (8.0)         | 10839 (7.3)             |
| Transplant                | 2461 (1.6)                              | 66 (4.3)          | 2395 (1.6)              |
| Urology                   | 13269 (8.8)                             | 100 (6.5)         | 13169 (8.9)             |
| Vascular surgery          | 5068 (3.4)                              | 118 (7.7)         | 4950 (3.3)              |

523

524 **eTable 4. Sample size and power calculation.**

| <b>Study</b> | <b>Sample size</b> | <b>Prevalence of PFO</b> | <b>Event rate of stroke</b> | <b>Odds ratio</b> | <b>Power</b> |
|--------------|--------------------|--------------------------|-----------------------------|-------------------|--------------|
| Small        | 600                | 1.0%                     | 0.5%                        | 2.0               | 0.6%         |
| Small        | 600                | 24.3%                    | 0.5%                        | 2.0               | 6.9%         |
| Medium       | 1200               | 1.0%                     | 0.5%                        | 2.0               | 0.8%         |
| Medium       | 1200               | 15.0%                    | 0.5%                        | 2.0               | 7.9%         |
| Large        | 13 000             | 1.0%                     | 0.5%                        | 2.0               | 5.2%         |
| Large        | 13 000             | 17.0%                    | 0.5%                        | 2.0               | 83.9%        |
| Current      | 150 000            | 1.0%                     | 0.5%                        | 2.0               | 94.3%        |

525

**eTable 5. Baseline and intraoperative characteristics of subgroups stratified by baseline PFO-independent risk of stroke.\***

| Characteristics                                                | Total study population<br>(n = 150 198) | Low stroke risk<br>(n = 75 084) | High stroke risk<br>(n = 75 083) |
|----------------------------------------------------------------|-----------------------------------------|---------------------------------|----------------------------------|
| <b>Baseline characteristics and comorbid conditions</b>        |                                         |                                 |                                  |
| Age, mean (SD), y                                              | 55 (16)                                 | 50 (16)                         | 59 (6)                           |
| Female sex, No. (%)                                            | 82029 (54.6)                            | 42217 (56.2)                    | 39796 (53.0)                     |
| Body mass index, mean (SD)                                     | 28.5 (7.1)                              | 28.9 (7.2)                      | 28.1 (6.9)                       |
| ASA physical status classification <sup>a</sup> , median (IQR) | 2 (2-3)                                 | 2 (2-2)                         | 3 (2-3)                          |
| Charlson comorbidity index <sup>b</sup> , median (IQR)         | 2 (0-3)                                 | 1 (0-2)                         | 3 (1-6)                          |
| Smoking, No. (%)                                               | 30141 (20.1)                            | 12003 (16.0)                    | 18132 (24.1)                     |
| Hypertension, No. (%)                                          | 63955 (42.6)                            | 19671 (26.2)                    | 44266 (59.0)                     |
| Diabetes, No. (%)                                              | 21258 (14.2)                            | 5812 (7.7)                      | 15441 (20.6)                     |
| Dyslipidemia, No. (%)                                          | 48758 (32.5)                            | 16313 (21.7)                    | 32435 (43.2)                     |
| Coronary artery disease, No. (%)                               | 19654 (13.1)                            | 3876 (5.2)                      | 15774 (21.0)                     |
| Myocardial infarction, No. (%)                                 | 2702 (1.8)                              | 461 (0.6)                       | 2239 (3.0)                       |
| Congestive heart failure, No. (%)                              | 9617 (6.4)                              | 1371 (1.8)                      | 8243 (11.0)                      |
| Pulmonary edema, No. (%)                                       | 10299 (6.9)                             | 1952 (2.6)                      | 8346 (11.1)                      |
| Pulmonary hypertension, No. (%)                                | 2212 (1.5)                              | 323 (0.4)                       | 1887 (2.5)                       |
| Cardiomyopathy, No. (%)                                        | 5043 (3.4)                              | 778 (1.0)                       | 4265 (5.7)                       |
| Congenital heart disease, No. (%)                              | 1079 (0.7)                              | 315 (0.4)                       | 764 (1.0)                        |
| Eisenmenger's syndrome, No. (%)                                | 188 (0.1)                               | 59 (0.1)                        | 129 (0.2)                        |
| Atrial fibrillation, No. (%)                                   | 12234 (8.1)                             | 2112 (2.8)                      | 10117 (13.5)                     |
| Valvular heart disease, No. (%)                                | 15808 (10.5)                            | 3557 (4.7)                      | 12244 (16.3)                     |
| COPD, No. (%)                                                  | 11421 (7.6)                             | 3604 (4.8)                      | 7813 (10.4)                      |
| Transient ischemic attack, No. (%)                             | 1739 (1.2)                              | 226 (0.3)                       | 1512 (2.0)                       |
| Ischemic stroke, No. (%)                                       | 3862 (2.6)                              | 425 (0.6)                       | 3435 (4.6)                       |
| Migraine, No. (%)                                              | 6050 (4.0)                              | 1871 (2.5)                      | 4178 (5.6)                       |
| Chronic kidney disease, No. (%)                                | 11293 (7.5)                             | 2613 (3.5)                      | 8673 (11.6)                      |
| Hypercoagulable state, No. (%)                                 | 14167 (9.4)                             | 4796 (6.4)                      | 9365 (12.5)                      |
| Deep vein thrombosis, No. (%)                                  | 3901 (2.6)                              | 958 (1.3)                       | 2943 (3.9)                       |
| Pulmonary embolism, No. (%)                                    | 2454 (1.6)                              | 589 (0.8)                       | 1864 (2.5)                       |
| Systemic embolic phenomenon, No. (%)                           | 8337 (5.6)                              | 2297 (3.1)                      | 6037 (8.0)                       |
| Prescription of medication within 28 days before surgery       |                                         |                                 |                                  |
| - Anticoagulants, No. (%)                                      | 46563 (31.0)                            | 14869 (19.8)                    | 31683 (42.2)                     |
| - Statins, No. (%)                                             | 35437 (23.6)                            | 6651 (8.9)                      | 28778 (38.3)                     |
| - Antiplatelet drugs, No. (%)                                  | 17879 (11.9)                            | 2727 (3.6)                      | 15149 (20.2)                     |
| - Beta blockers, No. (%)                                       | 20423 (13.6)                            | 3154 (4.2)                      | 17262 (23.0)                     |

| Characteristics                                                               | Total study population<br>(n = 150 198) | Low stroke risk<br>(n = 75 084) | High stroke risk<br>(n = 75 083) |
|-------------------------------------------------------------------------------|-----------------------------------------|---------------------------------|----------------------------------|
| <b>Intraoperative characteristics</b>                                         |                                         |                                 |                                  |
| Emergency procedure, No. (%)                                                  | 5993 (4.0)                              | 1338 (1.8)                      | 4638 (6.2)                       |
| High risk procedure <sup>c</sup> , No. (%)                                    | 59788 (39.8)                            | 16478 (21.9)                    | 43293 (57.7)                     |
| Inpatient procedure, No. (%)                                                  | 111949 (74.5)                           | 38508 (51.3)                    | 73413 (97.8)                     |
| Work relative value units <sup>d</sup><br>(median, IQR)                       | 14.5 (8.1-22.0)                         | 10.5 (6.8-15.5)                 | 19.5 (12.2-25.2)                 |
| Duration of procedure in<br>minutes (median, IQR)                             | 144 (92-227)                            | 111 (74-168)                    | 190 (122-277)                    |
| Intraoperative hypotensive<br>minutes MAP <55mmHg<br>(median, IQR)            | 0 (0-2)                                 | 0 (0-1)                         | 1 (0-2)                          |
| Total intraoperative<br>norepinephrine equivalent<br>dose in mg (median, IQR) | 0.0 (0.0-0.2)                           | 0.0 (0.0-0.0)                   | 0.1 (0.0-0.4)                    |
| Total intraoperative fluids in ml<br>(median, IQR)                            | 1250 (800-2000)                         | 1000 (750-1550)                 | 1500 (1000-2750)                 |
| Packed red blood cell units<br>transfused intraoperatively,<br>No. (%)        | 5193 (3.5)                              | 836 (1.1)                       | 4346 (5.8)                       |

529 \*Refer to Section 6.6 "Baseline PFO-independent risk of stroke". 31 patients with ASA physical status class V were not included due  
530 to failure to calculate the probability score for PFO-independent risk of perioperative ischemic stroke.

531 Abbreviations: SD, standard deviation; ASA, American Society of Anesthesiologists; IQR, interquartile range; COPD, chronic  
532 obstructive pulmonary disease; MAP, mean arterial pressure.

533 <sup>a</sup>The American Society of Anesthesiologists physical status classification system is used to evaluate a patient's physical state before  
534 undergoing anesthesia or surgery. The current definitions include 6 categories, from ASA I (normal healthy patient) to ASA VI  
535 (patient who is brain-dead).

536 <sup>b</sup>The Charlson comorbidity index is a method of estimating the risk of death by scoring a range of 22 comorbid diseases. Each  
537 condition is assigned a score of 1, 2, 3, or 6, and the total score is used to predict 10-year mortality.

538 <sup>c</sup>High risk procedures include surgery for burns, general surgery, neurosurgery, thoracic surgery, transplant surgery, and vascular  
539 surgery.

540 <sup>d</sup>Work relative value units are a measure of the value of the services provided by physicians, and is a marker of the procedural  
541 complexity.

542  
543

**eTable 6. Baseline and intraoperative characteristics of subgroups stratified by history of echocardiography prior to surgery.**

| Characteristics                                                | No echocardiography (n = 120 569) | Echocardiography          |                |                     |
|----------------------------------------------------------------|-----------------------------------|---------------------------|----------------|---------------------|
|                                                                |                                   | All patients (n = 29 629) | PFO (n = 1162) | No PFO (n = 28 467) |
| <b>Baseline characteristics and comorbid conditions</b>        |                                   |                           |                |                     |
| Age, mean (SD), y                                              | 54 (16)                           | 60 (16)                   | 58 (15)        | 60 (16)             |
| Female sex, No. (%)                                            | 67812 (56.2)                      | 1427 (48.0)               | 633 (54.5)     | 13584 (47.7)        |
| Body mass index, mean (SD)                                     | 28.4 (7.0)                        | 28.7 (7.4)                | 27.9 (7.1)     | 28.7 (7.4)          |
| ASA physical status classification <sup>a</sup> , median (IQR) | 2 (2-2)                           | 3 (2-3)                   | 3 (2-3)        | 3 (2-3)             |
| Charlson comorbidity index <sup>b</sup> , median (IQR)         | 1 (0-3)                           | 3 (1-7)                   | 4 (2-8)        | 3 (1-7)             |
| Smoking, No. (%)                                               | 23139 (19.2)                      | 7002 (23.6)               | 310 (26.7)     | 6692 (23.5)         |
| Hypertension, No. (%)                                          | 44778 (37.1)                      | 19177 (64.7)              | 766 (65.9)     | 18411 (64.7)        |
| Diabetes, No. (%)                                              | 13877 (11.5)                      | 7381 (24.9)               | 300 (25.8)     | 7081 (24.9)         |
| Dyslipidemia, No. (%)                                          | 34469 (28.6)                      | 14289 (48.2)              | 556 (47.8)     | 13733 (48.2)        |
| Coronary artery disease, No. (%)                               | 10139 (8.4)                       | 9515 (32.1)               | 431 (37.1)     | 9084 (31.9)         |
| Myocardial infarction, No. (%)                                 | 851 (0.7)                         | 1851 (6.2)                | 98 (8.4)       | 1753 (6.2)          |
| Congestive heart failure, No. (%)                              | 2714 (2.3)                        | 6903 (23.3)               | 374 (32.2)     | 6529 (22.9)         |
| Pulmonary edema, No. (%)                                       | 4200 (3.5)                        | 6099 (20.6)               | 322 (27.7)     | 5777 (20.3)         |
| Pulmonary hypertension, No. (%)                                | 460 (0.4)                         | 1752 (5.9)                | 143 (12.3)     | 1609 (5.7)          |
| Cardiomyopathy, No. (%)                                        | 800 (0.7)                         | 4243 (14.3)               | 206 (17.7)     | 4037 (14.2)         |
| Congenital heart disease, No. (%)                              | 311 (0.3)                         | 768 (2.6)                 | 66 (5.7)       | 702 (2.5)           |
| Eisenmenger's syndrome, No. (%)                                | 80 (0.1)                          | 108 (0.4)                 | 14 (1.2)       | 94 (0.3)            |
| Atrial fibrillation, No. (%)                                   | 4931 (4.1)                        | 7303 (24.6)               | 317 (27.3)     | 6986 (24.5)         |
| Valvular heart disease, No. (%)                                | 2609 (2.2)                        | 13199 (44.5)              | 683 (58.8)     | 12516 (44.0)        |
| COPD, No. (%)                                                  | 7047 (5.8)                        | 4374 (14.8)               | 215 (18.5)     | 4159 (14.6)         |
| Transient ischemic attack, No. (%)                             | 610 (0.5)                         | 1129 (3.8)                | 79 (6.8)       | 1050 (3.7)          |
| Ischemic stroke, No. (%)                                       | 1427 (1.2)                        | 2435 (8.2)                | 210 (18.1)     | 2225 (7.8)          |
| Migraine, No. (%)                                              | 4739 (3.9)                        | 1311 (4.4)                | 57 (4.9)       | 1254 (4.4)          |
| Chronic kidney disease, No. (%)                                | 5223 (4.3)                        | 6070 (20.5)               | 295 (25.4)     | 5775 (20.3)         |
| Hypercoagulable state, No. (%)                                 | 8619 (7.1)                        | 5548 (18.7)               | 328 (28.2)     | 5220 (18.3)         |
| Deep vein thrombosis, No. (%)                                  | 1939 (1.6)                        | 1962 (6.6)                | 114 (9.8)      | 1848 (6.5)          |
| Pulmonary embolism, No. (%)                                    | 1084 (0.9)                        | 1370 (4.6)                | 84 (7.2)       | 1286 (4.5)          |
| Systemic embolic phenomenon, No. (%)                           | 5405 (4.5)                        | 2932 (9.9)                | 144 (12.4)     | 2788 (9.8)          |
| Prescription of medication within 28 days before surgery       |                                   |                           |                |                     |
| - Anticoagulants, No. (%)                                      | 32038 (26.6)                      | 14525 (49.0)              | 594 (51.1)     | 13931 (48.9)        |
| - Statins, No. (%)                                             | 24407 (20.2)                      | 11030 (37.2)              | 456 (39.2)     | 10574 (37.1)        |
| - Antiplatelet drugs, No. (%)                                  | 10579 (8.8)                       | 7300 (24.6)               | 341 (29.3)     | 6959 (24.4)         |
| - Beta blockers, No. (%)                                       | 11486 (9.5)                       | 8937 (30.2)               | 377 (32.4)     | 8560 (30.1)         |

544

| Characteristics                                                         | No<br>echocardiography<br>(n = 120 569) | Echocardiography (n = 29 629) |                   |                        |
|-------------------------------------------------------------------------|-----------------------------------------|-------------------------------|-------------------|------------------------|
|                                                                         |                                         | All patients<br>(n = 29 629)  | PFO<br>(n = 1162) | No PFO<br>(n = 28 467) |
| <b>Intraoperative characteristics</b>                                   |                                         |                               |                   |                        |
| Emergency procedure, No. (%)                                            | 4487 (3.7)                              | 1506 (5.1)                    | 63 (5.4)          | 1443 (5.1)             |
| High risk procedure <sup>c</sup> , No. (%)                              | 47464 (39.4)                            | 12324 (41.6)                  | 542 (46.6)        | 11782 (41.4)           |
| Inpatient procedure, No. (%)                                            | 87242 (72.4)                            | 24707 (83.4)                  | 1035 (89.1)       | 23672 (83.2)           |
| Work relative value units <sup>d</sup> (median, IQR)                    | 15.0 (8.2-22.1)                         | 13.2 (7.5-20.1)               | 14.2 (8.1-20.7)   | 13.1 (7.5-20.1)        |
| Duration of procedure in minutes (median, IQR)                          | 144 (92-225)                            | 144 (90-235)                  | 155 (96-251)      | 144 (90-234)           |
| Intraoperative hypotensive minutes MAP <55mmHg (median, IQR)            | 0 (0-1)                                 | 0 (0-2)                       | 1 (0-3)           | 0 (0-2)                |
| Total intraoperative norepinephrine equivalent dose in mg (median, IQR) | 0.0 (0.0-0.2)                           | 0.1 (0.0-0.4)                 | 0.1 (0.0-0.4)     | 0.1 (0.0-0.3)          |
| Total intraoperative fluids in mL (median, IQR)                         | 1250 (850-2000)                         | 1100 (750-2000)               | 1050 (600-2134)   | 1100 (750-2000)        |
| Packed red blood cell units transfused intraoperatively, No. (%)        | 3383 (2.8)                              | 1810 (6.1)                    | 89 (7.7)          | 1721 (6.0)             |

545 Abbreviations: SD, standard deviation; ASA, American Society of Anesthesiologists; IQR, interquartile range; COPD, chronic  
546 obstructive pulmonary disease; MAP, mean arterial pressure.  
547 <sup>a</sup>The American Society of Anesthesiologists physical status classification system is used to evaluate a patient's physical state before  
548 undergoing anesthesia or surgery. The current definitions include 6 categories, from ASA I (normal healthy patient) to ASA VI  
549 (patient who is brain-dead).  
550 <sup>b</sup>The Charlson comorbidity index is a method of estimating the risk of death by scoring a range of 22 comorbid diseases. Each  
551 condition is assigned a score of 1, 2, 3, or 6, and the total score is used to predict 10-year mortality.  
552 <sup>c</sup>High risk procedures include surgery for burns, general surgery, neurosurgery, thoracic surgery, transplant surgery, and vascular  
553 surgery.  
554 <sup>d</sup>Work relative value units are a measure of the value of the services provided by physicians, and is a marker of the procedural  
555 complexity

556 **Section 9. References**

- 557 1. Bamford J, Sandercock P, Dennis M, Burn J, Warlow C. Classification and natural history of clinically  
558 identifiable subtypes of cerebral infarction. *Lancet*. 1991;337(8756):1521-1526.
- 559 2. Brott T, Adams HP, Jr., Olinger CP, et al. Measurements of acute cerebral infarction: a clinical  
560 examination scale. *Stroke*. 1989;20(7):864-870.
- 561 3. Paul P, Pennell ML, Lemeshow S. Standardizing the power of the Hosmer-Lemeshow goodness of fit test  
562 in large data sets. *Stat Med*. 2013;32(1):67-80.
- 563 4. Brueckmann B, Villa-Uribe JL, Bateman BT, et al. Development and validation of a score for prediction of  
564 postoperative respiratory complications. *Anesthesiology*. 2013;118(6):1276-1285.
- 565 5. Austin PC. An Introduction to Propensity Score Methods for Reducing the Effects of Confounding in  
566 Observational Studies. *Multivariate Behavioral Research*. 2011;46(3):399-424.
- 567 6. Overell JR, Bone I, Lees KR. Interatrial septal abnormalities and stroke: a meta-analysis of case-control  
568 studies. *Neurology*. 2000;55(8):1172-1179.
- 569 7. Alsheikh-Ali AA, Thaler DE, Kent DM. Patent foramen ovale in cryptogenic stroke: incidental or  
570 pathogenic? *Stroke*. 2009;40(7):2349-2355.
- 571 8. Raghunathan TW, Lepkowski JM, Van Hoewyk J, Solenbeger P. A multivariate technique for multiply  
572 imputing missing values using a sequence of regression models. *Survey Methodology*. 2001;27(1):85-95.
- 573 9. Yaggi H, Mohsenin V. Obstructive sleep apnoea and stroke. *Lancet Neurol*. 2004;3(6):333-342.
- 574 10. Shin CH, Grabitz SD, Timm FP, et al. Development and validation of a Score for Preoperative Prediction  
575 of Obstructive Sleep Apnea (SPOSA) and its perioperative outcomes. *BMC Anesthesiol*. 2017;17(1):71.
