# Supplementary material
Source: PubMed Central journal article supplement (PMC5839297)
Supplement: jama-319-452-s003.pdf [file jama-319-452-s003.pdf]

# STATISTICAL ANALYSIS PLAN

## Patent foramen ovale with the association with perioperative ischemic stroke

Primary Investigator: Matthias Eikermann, MD PhD

Statisticians: Timothy T. Houle, PhD, Sara Burns, MS

Original Date: Jan 31, 2017

Updated: Mar 2, 2017

Note: Revision after consultation with external collaborators. Costs of hospital stay added as secondary outcome and falsification analysis added.

Updated: Jun 23, 2017

Note: Revision in response to peer review (NEJM). Additional confounders added to the model: coronary artery disease, congestive heart failure, pulmonary edema, pulmonary hypertension, cardiomyopathy, congenital heart disease, valvular heart disease, hypercoagulable state, deep vein thrombosis, pulmonary embolism, and systemic embolic phenomenon.

Updated: Nov 15, 2017

- Note: Revision in response to peer review (JAMA). Several post hoc subgroup analyses were added for the primary outcome: patients who underwent transthoracic vs transesophageal echocardiography, and patients who underwent agitated saline testing. Additional falsification testing in the subgroup of patients who had history of echocardiogram was included. A mixed effects logistic regression model to account for the impact of variation from different healthcare facilities was added as post hoc analyses. Exploratory analyses to adjust of different surgical services and duration of data availability were added. Finally, the association between PFO and post-discharge stroke were added in response to reviewer concerns.

28 **Primary Objective**

- 29 • To investigate whether or not an association exists between PFO and perioperative ischemic  
30 stroke.
- 31 ○  $H_0: p(\text{stroke} | \text{PFO}+) = p(\text{stroke} | \text{PFO}-)$
  - 32 ○  $H_1: p(\text{stroke} | \text{PFO}+) \neq p(\text{stroke} | \text{PFO}-)$

33 The primary hypothesis is that the probability (p) of ischemic stroke for those with patent foramen ovale  
34 (PFO+) is *greater than* the probability of stroke for those without patent foramen ovale (PFO-). Although  
35 the hypothesis is directional, the statistical hypothesis testing will be two-tailed.

36

37 **Secondary Objectives**

- 38 • To investigate whether or not an association exists between PFO and:
- 39 ○ 30-day readmission
  - 40 ○ 30-day mortality
  - 41 ○ costs of hospital stay
  - 42 ○ stroke subtype by Oxford Community Stroke Project
  - 43 ○ stroke-related neurologic deficit (NIHSS)

44

45

**Statistical Methodology**

46 **Data Sources**

47 Data will be obtained from the MetaVision Anesthesia Information Management System  
48 (AIMS) (iMDsoft, Dedham, MA), the Research Patient Data Registry (RPDR), and Enterprise  
49 Performance Systems Inc (EPSi) (Allscripts Healthcare) at Massachusetts General Hospital. The  
50 AIMS prospectively collects intraoperative data including physiological parameters such as  
51 blood pressure, ventilator and respiratory indices, administered drug doses, and fluid volumes.  
52 This is matched to the patients' demographic data and pre-/post-procedural condition using  
53 RPDR, a centralized clinical data warehouse that compiles health records and billing data from  
54 various Partners hospital systems specifically for research purposes. Information on hospital  
55 length of stay and costs will be collected through EPSi. Work relative value units (work RVU), a  
56 marker of operation procedural complexity, will be recorded.

57

58 **Outcomes**

59 The primary outcome is perioperative ischemic stroke within 30 days of surgery. The  
60 secondary outcomes are 30 day hospital readmission, 30 day mortality, and costs of hospital  
61 stay. Hospital readmission is defined as an in-patient readmission to the same hospital.

62

63

64

## 65 **Statistical Methods**

66 All analyses will be performed with pre-specified endpoints and statistical methods. Associations  
67 between PFO status and primary and secondary outcomes will be examined using both unadjusted  
68 (crude) and adjusted methods. Unadjusted analyses will be conducted using chi-square tests for  
69 categorical variables and Student's t-test or Wilcoxon rank-sum tests for continuous variables.

70 The primary analysis will utilize multivariable logistic regression modeling to evaluate the  
71 relationship between having a PFO and perioperative ischemic stroke while controlling for confounding  
72 variables selected a priori based on data in the published literature and biological plausibility. This  
73 model will be conducted using forced variable entry and evaluated using calibration tests (Hosmer-  
74 Lemeshow) and discrimination indices (AUC). Covariates included in the model will include baseline  
75 patient characteristics such as age, sex, body mass index, ASA physical status classification, and Charlson  
76 comorbidity index; coexisting conditions such as history of cigarette smoking, hypertension, diabetes  
77 mellitus, dyslipidemia, coronary artery disease, myocardial infarction, congestive heart failure,  
78 pulmonary edema, pulmonary hypertension, cardiomyopathy, congenital heart disease, atrial  
79 fibrillation, valvular heart disease, chronic obstructive pulmonary disease, migraine, chronic kidney  
80 disease, hypercoagulable state, deep vein thrombosis, pulmonary embolism, and systemic embolic  
81 phenomenon; prescription within 28 days before surgery of beta-blockers, statins, anti-platelet agents,  
82 and anticoagulants. Factors relating to surgery, including emergency surgery status, inpatient surgery,  
83 high risk surgical service, duration of surgery, intraoperative hypotensive minutes, intraoperative dose  
84 of vasopressors, intraoperative fluid volumes, requirement for packed red blood cells transfusion, and  
85 work relative value units – a marker of procedural complexity, will also be adjusted by forcing them into  
86 the model.

87 Secondary models will be conducted using distributions and linking functions appropriate to the  
88 outcomes under study. For example, the association between PFO and ischemic stroke subtype, using  
89 the Oxfordshire Community Stroke Project (OCSP) classification, will be analyzed with a multinomial  
90 logistic regression model. The association between PFO and costs of hospital stay will be analyzed with a  
91 negative binomial regression model and log link.

92 Data management and statistical analyses will be performed in Stata software, version 13  
93 (StataCorp LP) and R Studio software, version 3.2.5 (R Foundation for Statistical Computing). Where  
94 appropriate, statistical significance will be interpreted using a two-tailed P value of less than 0.05.

95

## 96 **Planned Sensitivity Analyses**

97 To address potential bias in the diagnosis of PFO that may not be considered in the multivariable  
98 confounder model and to further consider the average treatment effect for those treated (ATT), a  
99 logistic regression model that estimates the likelihood of diagnosed PFO will be constructed based on  
100 coexisting medical conditions that may subject patients to echocardiography studies. The association of  
101 PFO with perioperative ischemic stroke will then be tested in a 5:1 propensity-score-matched cohort.  
102 Participants will be matched using the 'Matchit' package in R Studio, using a 1:5 matching ratio with  
103 nearest neighbor and sampling without replacement with a caliper set to 0.20. A direct comparison in

104 the incidence between those with stroke in both PFO exposure groups will be examined using a non-  
105 conditional (i.e., no blocking using pairings) logistic regression model.

106 The primary analysis will be repeated in a subgroup including only patients with a history of a  
107 documented echocardiogram in the same institution, in order to further control for unmeasured  
108 differences that biased the referral for evaluation by echocardiogram.

109 A probability score for the baseline risk of perioperative ischemic stroke independent of PFO  
110 diagnosis will be created based on comorbid conditions and surgical factors that are traditional risk  
111 factors for stroke, and the PFO-stroke association will be re-examined for heterogeneity across this  
112 baseline risk. Effect modification on the association between PFO and perioperative ischemic stroke by  
113 patient's baseline stroke risk will be tested by estimating a model with this risk score, PFO status, and  
114 introducing an interaction term (risk x PFO status) into the multivariable regression model.

115 Falsification testing will be performed with three postoperative outcomes selected based on a  
116 common contributing etiology of non-thrombotic tissue ischemia, but unlikely to be causally related to  
117 the presence or absence of PFO. The association between PFO status and each of these outcomes will  
118 be evaluated using the same multivariable model as the primary analysis. It is expected that no  
119 meaningful association between PFO and these outcomes will be observed.

120 The complete case method will be used in the primary statistical analysis. This approach  
121 assumes that the missing data are ignorable conditional on the covariates in the model. To further  
122 examine the potential impact of excluding cases with missing data, the primary analysis will be repeated  
123 with the entire cohort using the technique of multiple imputations by chained equations – 5 iterations  
124 with 5 imputations per iteration will be performed.

125

## 126 **Planned Exploratory Analyses**

127 Effect modification on the association between PFO and perioperative ischemic stroke by the  
128 occurrence of postoperative deep vein thrombosis (DVT) will be tested by adding an interaction term  
129 (PFO x DVT) to the primary multivariable model.

130 The relationship between PFO and other perioperative complications of embolic etiology, such as  
131 acute limb ischemia and renal artery embolism, will also be explored. Specifically, the association  
132 between PFO and:

- 133 ○ Perioperative systemic embolic complications – a composite of acute embolic events in  
134 the extremities, kidneys, spleen, splanchnic circulation, and retina within 30 days after  
135 surgery,
- 136 ○ Acute limb ischemia,
- 137 ○ Renal artery embolism, and
- 138 ○ Acute intestinal vascular insufficiency will be examined.

139 These binary outcomes will all be evaluated using the same logistic regression model as the  
140 primary analysis.

141

142 **Sample Size and Power**

143 The analyses will be conducted based on all available data from the observational period. A  
144 statistical power calculation was conducted to define the power available to detect a clinically  
145 meaningful effect size. For this calculation, we will define an odds ratio of 2.0 as a clinically meaningful  
146 association between PFO and perioperative ischemic stroke. Assuming an observed PFO rate of 1.0%, a  
147 one-sided alpha level of 0.025, and an events rate of 0.5% perioperative ischemic stroke within 30 days  
148 after surgery, we achieved 94.3% power to detect an odds ratio of 2.0 or greater. Previous studies have  
149 examined the PFO-stroke association in smaller sample sizes, but would have had modest levels of  
150 statistical power using our event rates.

151

152 **Post Hoc Sensitivity Analyses**

- 153 • Subgroup analysis of patients who underwent transthoracic vs transesophageal
- 154 echocardiography
- 155 • Subgroup analysis of patients who underwent agitated saline testing
- 156 • Falsification testing in subgroup of patients who had history of echocardiography
- 157 • Mixed effects logistic regression to account for the impact of variation from different healthcare
- 158 facilities

159

160 **Post Hoc Exploratory Analyses**

- 161 • Association between PFO and perioperative new onset atrial fibrillation
- 162 • Association between PFO and perioperative myocardial infarction
- 163 • Association between PFO and post-discharge stroke
- 164 • Adjustment for different surgical services
- 165 • Adjustment for duration of data availability

166

167
